# Supplementary material for: Hyperacute changes in blood mRNA expression profiles of rats after middle cerebral artery occlusion: Towards a stroke time signature
Source: PLoS One. 2018 Nov 15;13(11):e0206321. doi: 10.1371/journal.pone.0206321 (PMC6237327; doi:10.1371/journal.pone.0206321)
Supplement: S1 Table — List of the 1932 the genes with expression significantly varying over time (ranked by p-value of the F statistic, p<5x10-7). Genes presented with their p-value, probe ID, Ensemble gene ID and brief gene description. (XLSX) [file pone.0206321.s001.xlsx]

## Sheet: Supp Table 1
p-value	Probe ID	Gene Symbol	Description
1.83e-24	10722208	Mrgprx3	MAS-related GPR, member X3
7.18e-23	10940615	N/A
6.23e-22	10736312	Nos2	nitric oxide synthase 2, inducible
1.5e-21	10826956	Bank1	B-cell scaffold protein with ankyrin repeats 1
3.55e-21	10763768	Fcmr	Fc fragment of IgM receptor
4.77e-21	10748273	Cd79b	Cd79b molecule, immunoglobulin-associated beta
9.45e-21	10707142	Ldhc	lactate dehydrogenase C
1.28e-20	10922816	Il1r2	interleukin 1 receptor, type II
1.39e-20	10909411	Usp2	ubiquitin specific peptidase 2
1.87e-20	10783880	Tgm1	transglutaminase 1
2.46e-20	10826703	LOC691931	hypothetical protein LOC691931
3.08e-20	10828832	Rab44	RAB44, member RAS oncogene family
3.41e-20	10705065	Cd79al; Cd79a	Cd79a molecule-like; Cd79a molecule, immunoglobulin-associated alpha
6.38e-20	10721261	Cd33	CD33 molecule
7.1e-20	10893918	Sbno2	strawberry notch homolog 2 (Drosophila)
7.34e-20	10732941	Ebf1	early B-cell factor 1
7.38e-20	10864433	Prok2	prokineticin 2
8.69e-20	10728883	Ms4a1	membrane-spanning 4-domains, subfamily A, member 1
1.5e-19	10823363	P2ry13	purinergic receptor P2Y, G-protein coupled, 13
1.73e-19	10810144	Rrm2	ribonucleotide reductase M2
1.84e-19	10892472	Igd	immunoglobulin delta heavy chain constant region
2.13e-19	10769765	Fcrla	Fc receptor-like A
2.22e-19	10735331	Eno3	enolase 3, beta, muscle
2.4e-19	10826969	Bank1	B-cell scaffold protein with ankyrin repeats 1
3.04e-19	10766428	Tlr5	toll-like receptor 5
3.7e-19	10826943	Bank1	B-cell scaffold protein with ankyrin repeats 1
4.08e-19	10922492	Arid5a	AT rich interactive domain 5A (Mrf1 like)
4.24e-19	10824305	Sema4a	sema domain, immunoglobulin domain (Ig), transmembrane domain (TM) and short cytoplasmic domain, (semaphorin) 4A
6.88e-19	10880404	Ptafr	platelet-activating factor receptor
6.93e-19	10730131	Blnk	B-cell linker
7.19e-19	10810923	Hp	haptoglobin
8.36e-19	10703764	Vstm1	V-set and transmembrane domain containing 1
9.15e-19	10849279	Slc28a2	solute carrier family 28 (concentrative nucleoside transporter), member 2
9.75e-19	10933912	LOC100363193	LRRGT00076-like
9.79e-19	10775519	Gpat3	glycerol-3-phosphate acyltransferase 3
9.98e-19	10836588	Dhrs9	dehydrogenase/reductase (SDR family) member 9
1.11e-18	10926252	RGD1307182	similar to RIKEN cDNA B430306N03 gene
1.11e-18	10868627	Glipr2	GLI pathogenesis-related 2
1.13e-18	10751437	LOC100911790	stefin-3-like
1.22e-18	10923470	Ptp4a1; LOC100365697; LOC103693189	protein tyrosine phosphatase type IVA, member 1; protein tyrosine phosphatase 4a1-like; protein tyrosine phosphatase type IVA 1; protein tyrosine phosphatase type IVA, member 1 [Source:RGD Symbol;Acc:61970]
1.23e-18	10808959	Nrp1	neuropilin 1
1.27e-18	10924230	Rufy4	RUN and FYVE domain containing 4
1.28e-18	10927195	Ptp4a1; LOC100365697; LOC103693189	protein tyrosine phosphatase type IVA, member 1; protein tyrosine phosphatase 4a1-like; protein tyrosine phosphatase type IVA 1; protein tyrosine phosphatase type IVA, member 1 [Source:RGD Symbol;Acc:61970]
1.31e-18	10812292	N/A
1.91e-18	10749372	Socs3	suppressor of cytokine signaling 3
1.92e-18	10832602	Bcr	breakpoint cluster region
1.98e-18	10747506	Stat3	signal transducer and activator of transcription 3 (acute-phase response factor)
2.39e-18	10894369	Pram1	PML-RARA regulated adaptor molecule 1
2.42e-18	10845708	Ifih1	interferon induced with helicase C domain 1
2.49e-18	10725684	Cd19	CD19 molecule
2.53e-18	10808377	Crispld2	cysteine-rich secretory protein LCCL domain containing 2
2.64e-18	10792028	Ppp1r3b	protein phosphatase 1, regulatory subunit 3B
2.7e-18	10862082	Braf	B-Raf proto-oncogene, serine/threonine kinase
3.48e-18	10840448	Rin2	Ras and Rab interactor 2
3.88e-18	10715301	Ccnj	cyclin J
3.91e-18	10738071	Msl1	male-specific lethal 1 homolog (Drosophila)
4.09e-18	10800546	Mocos	molybdenum cofactor sulfurase
4.34e-18	10831940	Fkbp5	FK506 binding protein 5
4.43e-18	10751434	Stfa2l2	stefin A2-like 2
4.83e-18	10940628	N/A
4.84e-18	10828827	Cdkn1a	cyclin-dependent kinase inhibitor 1A
6.16e-18	10873355	Tmco4	transmembrane and coiled-coil domains 4
6.53e-18	10891352	Sptlc2	serine palmitoyltransferase, long chain base subunit 2
7.25e-18	10940647	N/A
7.67e-18	10933431	Bmx	BMX non-receptor tyrosine kinase
8.28e-18	10846286	Nfe2l2	nuclear factor, erythroid 2-like 2
8.78e-18	10865948	Klrb1b	killer cell lectin-like receptor subfamily B member 1B
1.11e-17	10703757	Tarm1	T cell-interacting, activating receptor on myeloid cells 1
1.15e-17	10716939	Adgrg6; LOC103690920	adhesion G protein-coupled receptor G6; uncharacterized LOC103690920
1.22e-17	10817074	Pglyrp4	peptidoglycan recognition protein 4
1.33e-17	10703776	Nlrp12	NLR family, pyrin domain containing 12
1.41e-17	10931017	Sema6b	sema domain, transmembrane domain (TM), and cytoplasmic domain, (semaphorin) 6B
1.46e-17	10773961	Xbp1	X-box binding protein 1
1.48e-17	10755013	Il1rap	interleukin 1 receptor accessory protein
1.49e-17	10775398	Nudt9	nudix (nucleoside diphosphate linked moiety X)-type motif 9
1.59e-17	10779006	Dusp13; LOC100909469	dual specificity phosphatase 13; dual specificity protein phosphatase 13-like
1.64e-17	10860597	Steap4	STEAP family member 4
1.66e-17	10759999	Alox5ap	arachidonate 5-lipoxygenase activating protein
1.71e-17	10740843	Mmp25	matrix metallopeptidase 25
1.78e-17	10925158	Ugt1a5; Ugt1a6; Ugt1a1; Ugt1a7c; Ugt1a8; Ugt1a2; Ugt1a3; Ugt1a9; Ugt1a9-ps	UDP glucuronosyltransferase 1 family, polypeptide A5; UDP glucuronosyltransferase 1 family, polypeptide A6; UDP glucuronosyltransferase 1 family, polypeptide A1; UDP glucuronosyltransferase 1 family, polypeptide A7C; UDP glycosyltransferase 1 family, polypeptide A8; UDP glucuronosyltransferase 1 family, polypeptide A2; UDP glycosyltransferase 1 family, polypeptide A3; UDP glucuronosyltransferase …
1.93e-17	10762051	Hvcn1	hydrogen voltage-gated channel 1
1.95e-17	10794116	Hk3	hexokinase 3 (white cell)
1.96e-17	10750524	Mx2	myxovirus (influenza virus) resistance 2
2.02e-17	10783933	Adcy4	adenylate cyclase 4
2.23e-17	10841693	Lbp	lipopolysaccharide binding protein
2.3e-17	10926277	Trem1	triggering receptor expressed on myeloid cells 1
2.3e-17	10932037	Akap17b	A kinase (PRKA) anchor protein 17B
2.39e-17	10940686	N/A
2.51e-17	10834502	Pnpla7	patatin-like phospholipase domain containing 7
2.81e-17	10901409	Chst11	carbohydrate (chondroitin 4) sulfotransferase 11
2.98e-17	10750277	Mrps6	mitochondrial ribosomal protein S6
2.99e-17	10754592	Heg1	heart development protein with EGF-like domains 1
3.1e-17	10812354	Mef2c	myocyte enhancer factor 2C
3.13e-17	10901413	Txnrd1	thioredoxin reductase 1
3.29e-17	10778028	Tcn2	transcobalamin 2
3.64e-17	10910619	Uaca	uveal autoantigen with coiled-coil domains and ankyrin repeats
3.69e-17	10814331	Tpd52	tumor protein D52
3.75e-17	10774171	Upp1	uridine phosphorylase 1
3.84e-17	10883903	Rrm2	ribonucleotide reductase M2
3.88e-17	10931034	Lrg1	leucine-rich alpha-2-glycoprotein 1
4.02e-17	10940620	N/A
4.19e-17	10828778	Mapk13	mitogen activated protein kinase 13
4.29e-17	10851560	Wfdc15b	WAP four-disulfide core domain 15B
5.98e-17	10839320	Sqrdl	sulfide quinone reductase-like (yeast)
6.15e-17	10755544	B3gnt5	UDP-GlcNAc:betaGal beta-1,3-N-acetylglucosaminyltransferase 5
6.17e-17	10762254	Oas1k	2 -5 oligoadenylate synthetase 1K; 2 ' -5 ' oligoadenylate synthetase 1K [Source:RGD Symbol;Acc:1359279]
7.27e-17	10906373	Cpne8	copine VIII
7.47e-17	10746293	Abcc3	ATP-binding cassette, subfamily C (CFTR/MRP), member 3
7.51e-17	10764722	Ncf2	neutrophil cytosolic factor 2
7.59e-17	10826691	Ap1ar	adaptor-related protein complex 1 associated regulatory protein
7.82e-17	10940619	N/A
8.54e-17	10801821	Lmnb1	lamin B1
8.7e-17	10897428	Csf2rb	colony stimulating factor 2 receptor, beta, low-affinity (granulocyte-macrophage)
9.48e-17	10751871	Fgf12	fibroblast growth factor 12
9.72e-17	10809204	Adgrg3	adhesion G protein-coupled receptor G3
1.01e-16	10920860	Myd88	myeloid differentiation primary response 88
1.05e-16	10726550	Adam8	ADAM metallopeptidase domain 8
1.06e-16	10773148	Fbxl5	F-box and leucine-rich repeat protein 5
1.2e-16	10788627	Nrg1	neuregulin 1
1.2e-16	10722992	Anpep	alanyl (membrane) aminopeptidase
1.32e-16	10774383	Vps54	vacuolar protein sorting 54 homolog (S. cerevisiae)
1.32e-16	10851581	Slpi	secretory leukocyte peptidase inhibitor
1.35e-16	10753959	Btla	B and T lymphocyte associated
1.41e-16	10845814	Galnt3	polypeptide N-acetylgalactosaminyltransferase 3
1.41e-16	10750282	Slc5a3	solute carrier family 5 (sodium/myo-inositol cotransporter), member 3
1.48e-16	10796440	Pter	phosphotriesterase related
1.54e-16	10911315	Myo1e	myosin IE
1.56e-16	10825443	Cd101	CD101 molecule
1.58e-16	10709860	Swap70	SWAP switching B-cell complex 70
1.63e-16	10907924	Mmp27	matrix metallopeptidase 27
1.67e-16	10863430	Hk2	hexokinase 2
1.72e-16	10924245	Cxcr2	chemokine (C-X-C motif) receptor 2
1.78e-16	10756178	Fcer2	Fc fragment of IgE, low affinity II, receptor for (CD23)
2.09e-16	10774094	Ppia	peptidylprolyl isomerase A (cyclophilin A)
2.11e-16	10820223	Mef2c	myocyte enhancer factor 2C
2.24e-16	10852636	Sqrdl	sulfide quinone reductase-like (yeast)
2.25e-16	10898315	Fbln1	fibulin 1
2.25e-16	10871957	Csf3r	colony stimulating factor 3 receptor (granulocyte)
2.28e-16	10821383	Snx18	sorting nexin 18
2.3e-16	10794866	Serpinb1a	serine (or cysteine) proteinase inhibitor, clade B, member 1a
2.38e-16	10718351	Fpr1	formyl peptide receptor 1
2.84e-16	10782668	Pxk	PX domain containing serine/threonine kinase
2.93e-16	10900735	Cfd	complement factor D (adipsin)
2.98e-16	10940529	N/A
2.99e-16	10764079	Mybph	myosin binding protein H
3.24e-16	10916016	St3gal4	ST3 beta-galactoside alpha-2,3-sialyltransferase 4
3.34e-16	10854737	LOC103690059; Mgam	maltase-glucoamylase, intestinal-like; maltase-glucoamylase; maltase-glucoamylase [Source:MGI Symbol;Acc:MGI:1203495]
3.74e-16	10905689	Tnfrsf13c	tumor necrosis factor receptor superfamily, member 13c
4.06e-16	10880960	Padi4	peptidyl arginine deiminase, type IV
4.15e-16	10733849	LOC24906	RoBo-1
4.18e-16	10922882	Il18rap	interleukin 18 receptor accessory protein
5.42e-16	10912218	Plscr1	phospholipid scramblase 1
5.92e-16	10754363	LOC689230	similar to stefin A2
6.46e-16	10721268	Siglec8	sialic acid binding Ig-like lectin 8
6.9e-16	10910641	Tle3	transducin-like enhancer of split 3
7.01e-16	10769735	Atf6	activating transcription factor 6
7.11e-16	10712171	Ifitm1	interferon induced transmembrane protein 1
8.15e-16	10711260	Trim72	tripartite motif containing 72, E3 ubiquitin protein ligase
8.49e-16	10772770	Tlr10; Tlr1	toll-like receptor 10; toll-like receptor 1
9.55e-16	10858581	Clec4b2	C-type lectin domain family 4, member B2
9.7e-16	10717620	Syne1; LOC103690962; LOC103690963	spectrin repeat containing, nuclear envelope 1; nesprin-1-like; spectrin repeat containing, nuclear envelope 1 [Source:RGD Symbol;Acc:620546]
9.88e-16	10795646	Rab18	RAB18, member RAS oncogene family
9.96e-16	10872935	Cnr2	cannabinoid receptor 2 (macrophage)
1.02e-15	10852200	Sycp2	synaptonemal complex protein 2
1.04e-15	10794225	Nfil3	nuclear factor, interleukin 3 regulated
1.05e-15	10739913	N/A
1.06e-15	10922428	Ptpn18	protein tyrosine phosphatase, non-receptor type 18
1.08e-15	10866850	Kras	Kirsten rat sarcoma viral oncogene
1.16e-15	10858390	Slc6a12	solute carrier family 6 (neurotransmitter transporter), member 12
1.26e-15	10703751	Oscar	osteoclast associated, immunoglobulin-like receptor
1.27e-15	10747330	Jup	junction plakoglobin
1.28e-15	10789725	Spin1	spindlin 1
1.4e-15	10814480	LOC682571	similar to spindlin
1.4e-15	10771012	Fam69a	family with sequence similarity 69, member A
1.4e-15	10767716	Lax1	lymphocyte transmembrane adaptor 1
1.55e-15	10733982	Nlrp3	NLR family, pyrin domain containing 3
1.67e-15	10779002	LOC100909469; Dusp13	dual specificity protein phosphatase 13-like; dual specificity phosphatase 13
1.69e-15	10816144	Sfrp2	secreted frizzled-related protein 2
1.75e-15	10875680	Cpne3	copine III
1.82e-15	10826954	Bank1	B-cell scaffold protein with ankyrin repeats 1
1.82e-15	10901962	Plxnc1	plexin C1
1.99e-15	10818326	Sort1	sortilin 1
2e-15	10739353	Kcnj2	potassium channel, inwardly rectifying subfamily J, member 2
2.03e-15	10858648	C1rl	complement component 1, r subcomponent-like
2.06e-15	10870046	Inadl	InaD-like (Drosophila)
2.14e-15	10785590	Klf12	Kruppel-like factor 12
2.22e-15	10864840	Tmcc1	transmembrane and coiled-coil domain family 1
2.25e-15	10849125	Ell3	elongation factor RNA polymerase II-like 3
2.34e-15	10706346	Vsig10l	V-set and immunoglobulin domain containing 10 like
2.42e-15	10703666	Pirb	paired Ig-like receptor B
2.45e-15	10869487	RGD1304595	similar to RIKEN cDNA 6330416G13 gene
2.61e-15	10723866	Dgat2	diacylglycerol O-acyltransferase 2
2.66e-15	10709880	Ampd3	adenosine monophosphate deaminase 3
2.68e-15	10714273	LOC499331	similar to hypothetical protein D030056L22
2.69e-15	10831077	Ier3	immediate early response 3
2.76e-15	10893258	Cd63	Cd63 molecule
2.88e-15	10878674	Osbpl9	oxysterol binding protein-like 9
2.89e-15	10765195	Selp	selectin P
2.94e-15	10718934	Fcar	Fc fragment of IgA receptor
2.96e-15	10769788	Fcgr2a	Fc fragment of IgG, low affinity IIa, receptor
3.08e-15	10798420	Cmah	cytidine monophospho-N-acetylneuraminic acid hydroxylase
3.11e-15	10796445	Vim	vimentin
3.18e-15	10894616	N/A
3.24e-15	10865381	Clec4e	C-type lectin domain family 4, member E
3.38e-15	10858599	Clec4d	C-type lectin domain family 4, member D
3.4e-15	10751091	Cd200	Cd200 molecule
3.43e-15	10842707	Fam217b	family with sequence similarity 217, member B
3.46e-15	10776888	Fam114a1	family with sequence similarity 114, member A1
3.46e-15	10857950	Atg7	autophagy related 7
3.58e-15	10867045	LOC100911252	peptidyl-prolyl cis-trans isomerase A-like
3.58e-15	10771984	Ppia	peptidylprolyl isomerase A (cyclophilin A)
3.66e-15	10817370	Fam63a	family with sequence similarity 63, member A
3.68e-15	10860327	Sema3c	sema domain, immunoglobulin domain (Ig), short basic domain, secreted, (semaphorin) 3C
3.69e-15	10736486	Cpd	carboxypeptidase D
3.72e-15	10772768	Tlr6	toll-like receptor 6
3.86e-15	10722317	Nipa2	non imprinted in Prader-Willi/Angelman syndrome 2
4.24e-15	10751431	Stfa2l2	stefin A2-like 2
4.58e-15	10731922	Mefv	Mediterranean fever
4.78e-15	10704665	Pglyrp1	peptidoglycan recognition protein 1
4.82e-15	10909761	Cadm1	cell adhesion molecule 1
4.98e-15	10940618	N/A
4.99e-15	10754995	Ccdc50	coiled-coil domain containing 50
5e-15	10826967	Bank1	B-cell scaffold protein with ankyrin repeats 1
5.03e-15	10829116	Slc37a1	solute carrier family 37 (glucose-6-phosphate transporter), member 1
5.2e-15	10797572	Spin1	spindlin 1
5.23e-15	10929319	RGD1563713	ras-related protein Rab-18-like
5.66e-15	10804017	Diaph1	diaphanous-related formin 1
5.78e-15	10744687	Slc13a5	solute carrier family 13 (sodium-dependent citrate transporter), member 5
5.82e-15	10834719	Rxra	retinoid X receptor alpha
5.84e-15	10903971	Fam84b	family with sequence similarity 84, member B
5.94e-15	10863726	Mxd1	max dimerization protein 1
6.05e-15	10828344	RT1-Da	RT1 class II, locus Da
6.17e-15	10716896	Phactr2	phosphatase and actin regulator 2
6.3e-15	10801884	Slc12a2	solute carrier family 12 (sodium/potassium/chloride transporter), member 2
6.38e-15	10756161	Cd209a	CD209a molecule
6.44e-15	10938219	Gk	glycerol kinase
6.54e-15	10829993	MGC112715	hypothetical protein LOC690899
6.58e-15	10730636	Calhm2	calcium homeostasis modulator 2
7.05e-15	10720790	Ffar2	free fatty acid receptor 2
7.22e-15	10796149	Pfkfb3	6-phosphofructo-2-kinase/fructose-2,6-biphosphatase 3
7.41e-15	10864404	Foxp1	forkhead box P1
8.22e-15	10746968	N/A
8.49e-15	10801308	Arhgap26	Rho GTPase activating protein 26
8.69e-15	10932475	Eras	ES cell expressed Ras
8.84e-15	10754983	Il13ra1	interleukin 13 receptor, alpha 1
8.88e-15	10826958	Bank1	B-cell scaffold protein with ankyrin repeats 1
9.02e-15	10716303	Fam160b1	family with sequence similarity 160, member B1
9.15e-15	10826682	Alpk1	alpha-kinase 1
9.3e-15	10733056	Ifi47	interferon gamma inducible protein 47
9.57e-15	10905335	Card10	caspase recruitment domain family, member 10
9.6e-15	10840890	Id1	inhibitor of DNA binding 1
9.62e-15	10799461	Sfmbt2	Scm-like with four mbt domains 2
9.64e-15	10766726	Tmem206	transmembrane protein 206
1.03e-14	10752262	LOC100361706	lambda-chain C1-region-like
1.03e-14	10864512	Il5ra	interleukin 5 receptor, alpha
1.1e-14	10909590	Mpzl2	myelin protein zero-like 2
1.12e-14	10759604	Mcemp1	mast cell-expressed membrane protein 1
1.13e-14	10820282	Vcan	versican
1.18e-14	10818594	Dbt	dihydrolipoamide branched chain transacylase E2
1.2e-14	10703508	LOC102557368	uncharacterized LOC102557368
1.44e-14	10903977	Fam84b	family with sequence similarity 84, member B
1.53e-14	10837621	N/A
1.64e-14	10924803	Csprs	component of Sp100-rs
1.64e-14	10758351	Niacr1	niacin receptor 1
1.65e-14	10889965	Baz1a	bromodomain adjacent to zinc finger domain, 1A
1.76e-14	10792863	Atp11a	ATPase, class VI, type 11A
1.76e-14	10794242	Sema4d	sema domain, immunoglobulin domain (Ig), transmembrane domain (TM) and short cytoplasmic domain, (semaphorin) 4D
1.8e-14	10763758	Pigr	polymeric immunoglobulin receptor
1.82e-14	10744545	Scimp	SLP adaptor and CSK interacting membrane protein
1.96e-14	10901910	Amdhd1	amidohydrolase domain containing 1
1.99e-14	10886036	Jdp2	Jun dimerization protein 2
2.08e-14	10770497	Hlx	H2.0-like homeobox
2.22e-14	10788427	Msr1	macrophage scavenger receptor 1
2.23e-14	10816278	Fcrl1	Fc receptor-like 1
2.24e-14	10848450	Plcb2; Ankrd63	phospholipase C, beta 2; ankyrin repeat domain 63
2.25e-14	10807140	RGD621098	similar to RIKEN cDNA D230025D16Rik
2.29e-14	10936365	N/A
2.37e-14	10788374	Mtus1	microtubule associated tumor suppressor 1
2.47e-14	10770778	Traf3ip3	TRAF3 interacting protein 3
2.47e-14	10782511	Nek10	NIMA-related kinase 10
2.52e-14	10701934	Il22ra2	interleukin 22 receptor, alpha 2
2.71e-14	10725953	Spn	sialophorin
2.92e-14	10824695	S100a9	S100 calcium binding protein A9
2.96e-14	10927562	Aff3	AF4/FMR2 family, member 3
2.97e-14	10807452	Nfatc3	nuclear factor of activated T-cells, cytoplasmic, calcineurin-dependent 3
3.15e-14	10888610	Lbh	limb bud and heart development
3.15e-14	10768742	Rgsl1	regulator of G-protein signaling like 1
3.17e-14	10842239	Mmp9	matrix metallopeptidase 9
3.39e-14	10878617	Zyg11b	zyg-11 family member B, cell cycle regulator
3.44e-14	10929211	Epha4	Eph receptor A4
3.59e-14	10802013	Cd74	Cd74 molecule, major histocompatibility complex, class II invariant chain
3.84e-14	10914799	Birc3	baculoviral IAP repeat-containing 3
3.95e-14	10769797	Fcgr2b; Fcgr2a	Fc fragment of IgG, low affinity IIb, receptor; Fc fragment of IgG, low affinity IIa, receptor
4.05e-14	10909948	Pou2af1	POU class 2 associating factor 1
4.06e-14	10813361	Dab2	disabled 2, mitogen-responsive phosphoprotein
4.11e-14	10819644	Ddah1	dimethylarginine dimethylaminohydrolase 1
4.31e-14	10895589	Cpm	carboxypeptidase M
4.35e-14	10750460	Ets2	v-ets avian erythroblastosis virus E26 oncogene homolog 2
4.37e-14	10759717	RGD1563425	similar to FLJ35784 protein
4.48e-14	10736135	Phf12; Dhrs13	PHD finger protein 12; dehydrogenase/reductase (SDR family) member 13
4.74e-14	10766760	Lpgat1	lysophosphatidylglycerol acyltransferase 1
5e-14	10854832	LOC103690059	maltase-glucoamylase, intestinal-like
5.13e-14	10811956	Sipa1l2	signal-induced proliferation-associated 1 like 2
5.31e-14	10728240	Prdx5	peroxiredoxin 5
5.76e-14	10709135	Fchsd2	FCH and double SH3 domains 2
5.86e-14	10854847	LOC679818	similar to Maltase-glucoamylase, intestinal
6.21e-14	10818920	Camk2d	calcium/calmodulin-dependent protein kinase II delta
6.26e-14	10802603	Cxxc1	CXXC finger protein 1
6.31e-14	10714903	Ifit3	interferon-induced protein with tetratricopeptide repeats 3
6.32e-14	10809824	Gpt2	glutamic pyruvate transaminase (alanine aminotransferase) 2
6.35e-14	10705034	Ceacam10	carcinoembryonic antigen-related cell adhesion molecule 10
6.5e-14	10708521	Ctsc	cathepsin C
6.69e-14	10838605	Eif2ak4	eukaryotic translation initiation factor 2 alpha kinase 4
6.81e-14	10735182	Clec10a	C-type lectin domain family 10, member A
7.03e-14	10794084	Rab24	RAB24, member RAS oncogene family
7.5e-14	10864848	Alox5	arachidonate 5-lipoxygenase
7.99e-14	10716746	Adgb	androglobin
8.11e-14	10815857	Schip1	schwannomin interacting protein 1
8.15e-14	10922826	Il1r1	interleukin 1 receptor, type I
8.2e-14	10914385	Trak1	trafficking protein, kinesin binding 1
8.42e-14	10725618	Xpo6	exportin 6
9.04e-14	10782704	Flnb	filamin B, beta
9.55e-14	10791935	Zdhhc2	zinc finger, DHHC-type containing 2
1.03e-13	10702829	Synj2	synaptojanin 2
1.08e-13	10849275	Slc28a2	solute carrier family 28 (concentrative nucleoside transporter), member 2
1.08e-13	10826672	Alpk1	alpha-kinase 1
1.09e-13	10907913	Mmp8	matrix metallopeptidase 8
1.1e-13	10731047	Ablim1	actin-binding LIM protein 1
1.19e-13	10789591	Rab20	RAB20, member RAS oncogene family
1.19e-13	10737663	Gngt2	guanine nucleotide binding protein (G protein), gamma transducing activity polypeptide 2
1.25e-13	10904593	RGD1565410	similar to Ly6-C antigen gene
1.29e-13	10852244	Ppp1r3d	protein phosphatase 1, regulatory subunit 3D
1.39e-13	10885740	Sipa1l1	signal-induced proliferation-associated 1 like 1
1.4e-13	10823970	Tlr2	toll-like receptor 2
1.42e-13	10736163	Flot2	flotillin 2
1.43e-13	10907793	Mettl7a	methyltransferase like 7A
1.44e-13	10727084	Cars	cysteinyl-tRNA synthetase
1.48e-13	10892143	Degs2	delta(4)-desaturase, sphingolipid 2
1.49e-13	10722743	Mctp2	multiple C2 domains, transmembrane 2
1.5e-13	10926683	Pla2g7	phospholipase A2, group VII (platelet-activating factor acetylhydrolase, plasma)
1.51e-13	10748118	Nsf	N-ethylmaleimide-sensitive factor
1.6e-13	10940595	N/A
1.66e-13	10921163	Ccr1	chemokine (C-C motif) receptor 1
1.66e-13	10772657	Rbm47	RNA binding motif protein 47
1.76e-13	10834213	Entpd2	ectonucleoside triphosphate diphosphohydrolase 2
1.78e-13	10866417	Hebp1	heme binding protein 1
1.79e-13	10705731	Ggn	gametogenetin
1.79e-13	10735436	XAF1	XIAP associated factor-1
1.8e-13	10787960	Hmgn2	high mobility group nucleosome binding domain 2
1.84e-13	10836446	Gca	grancalcin
1.87e-13	10732939	Ebf1	early B-cell factor 1
1.9e-13	10864713	N/A
1.93e-13	10721388	Spib	Spi-B transcription factor (Spi-1/PU.1 related)
1.93e-13	10770858	Cr2	complement component (3d/Epstein Barr virus) receptor 2
1.95e-13	10726679	Ifitm2	interferon induced transmembrane protein 2
1.96e-13	10717331	Sgk1	serum/glucocorticoid regulated kinase 1
1.97e-13	10912088	Nt5e	5 nucleotidase, ecto
2.04e-13	10791472	N/A
2.07e-13	10924151	Atic	5-aminoimidazole-4-carboxamide ribonucleotide formyltransferase/IMP cyclohydrolase
2.09e-13	10812216	Glrx	glutaredoxin (thioltransferase)
2.16e-13	10701830	Hivep2	human immunodeficiency virus type I enhancer binding protein 2
2.37e-13	10834022	Arrdc3	arrestin domain containing 3
2.39e-13	10853755	LOC100911252	peptidyl-prolyl cis-trans isomerase A-like
2.39e-13	10719364	Ccdc61	coiled-coil domain containing 61
2.39e-13	10786174	Anxa11	annexin A11
2.44e-13	10767723	Atp2b4	ATPase, Ca++ transporting, plasma membrane 4
2.47e-13	10940554	N/A
2.55e-13	10794328	Fgd3	FYVE, RhoGEF and PH domain containing 3
2.68e-13	10909603	Amica1	adhesion molecule, interacts with CXADR antigen 1
2.74e-13	10822583	Fndc3b	fibronectin type III domain containing 3B
2.79e-13	10719777	Pou2f2	POU class 2 homeobox 2
2.85e-13	10891039	Numb	numb homolog (Drosophila)
2.88e-13	10831557	RT1-Db1	RT1 class II, locus Db1
2.93e-13	10764781	Rnasel	ribonuclease L (2,5-oligoisoadenylate synthetase-dependent)
3e-13	10706308	Siglec10	sialic acid binding Ig-like lectin 10
3.05e-13	10854239	Strip2	striatin interacting protein 2
3.06e-13	10930428	Emilin2	elastin microfibril interfacer 2
3.19e-13	10896793	Trib1	tribbles pseudokinase 1
3.32e-13	10726687	Ifitm6	interferon induced transmembrane protein 6
3.38e-13	10718942	N/A
3.4e-13	10737047	Car4	carbonic anhydrase 4
3.65e-13	10815317	Foxo1	forkhead box O1
3.7e-13	10798108	Ripk1	receptor (TNFRSF)-interacting serine-threonine kinase 1
3.82e-13	10768754	Rgsl1	regulator of G-protein signaling like 1
3.86e-13	10809912	Man2b1	mannosidase, alpha, class 2B, member 1
3.86e-13	10927041	Ogfrl1	opioid growth factor receptor-like 1
3.87e-13	10718602	Mir290	microRNA 290
3.99e-13	10734342	Mmgt2	membrane magnesium transporter 2
4.07e-13	10839974	Atrn	attractin
4.11e-13	10832808	Jmjd1c	jumonji domain containing 1C
4.27e-13	10797811	Cd83	CD83 molecule
4.43e-13	10914042	N/A
4.65e-13	10919494	Mras	muscle RAS oncogene homolog
4.67e-13	10727067	Nap1l4	nucleosome assembly protein 1-like 4
4.82e-13	10766998	N/A
4.88e-13	10716785	Rab32	RAB32, member RAS oncogene family
4.9e-13	10911811	N/A
4.92e-13	10781829	Klf5	Kruppel-like factor 5
5.04e-13	10902492	Rab3ip	RAB3A interacting protein
5.19e-13	10701846	Cited2	Cbp/p300-interacting transactivator, with Glu/Asp-rich carboxy-terminal domain, 2
5.23e-13	10869483	Atp6v1g1	ATPase, H transporting, lysosomal V1 subunit G1
5.39e-13	10827231	Cyr61	cysteine-rich, angiogenic inducer, 61
5.44e-13	10852136	Zbp1	Z-DNA binding protein 1
5.73e-13	10764069	Chi3l1	chitinase 3-like 1 (cartilage glycoprotein-39)
5.92e-13	10710541	Mettl9	methyltransferase like 9
5.93e-13	10715258	Entpd1	ectonucleoside triphosphate diphosphohydrolase 1
5.94e-13	10863639	Sfxn5	sideroflexin 5
6.21e-13	10926930	Mcm3	minichromosome maintenance complex component 3
6.47e-13	10710063	N/A
6.47e-13	10924769	Agfg1	ArfGAP with FG repeats 1
6.47e-13	10828714	Ppard	peroxisome proliferator-activated receptor delta
6.61e-13	10762247	Oas1b	2-5 oligoadenylate synthetase 1B
6.66e-13	10714900	Ifit2	interferon-induced protein with tetratricopeptide repeats 2
6.7e-13	10794800	Pxdc1	PX domain containing 1
6.71e-13	10768979	Soat1	sterol O-acyltransferase 1
6.95e-13	10826607	Ugt8	UDP glycosyltransferase 8
7.1e-13	10857546	Itpr1	inositol 1,4,5-trisphosphate receptor, type 1
7.13e-13	10831060	Flot1	flotillin 1
7.42e-13	10753425	Mx1	myxovirus (influenza virus) resistance 1
7.46e-13	10877630	Megf9	multiple EGF-like-domains 9
7.73e-13	10719847	Ceacam1	carcinoembryonic antigen-related cell adhesion molecule 1 (biliary glycoprotein)
7.97e-13	10818633	Frrs1	ferric-chelate reductase 1
8.07e-13	10782493	Nek10	NIMA-related kinase 10
8.09e-13	10829313	Trpm2	transient receptor potential cation channel, subfamily M, member 2
8.16e-13	10882273	Agrn	agrin
8.36e-13	10940594	N/A
8.85e-13	10886756	Evl	Enah/Vasp-like
9.14e-13	10926405	Zfp318	zinc finger protein 318
9.39e-13	10712317	Pnpla2	patatin-like phospholipase domain containing 2
9.43e-13	10765339	Cd247	Cd247 molecule
9.44e-13	10863777	Antxr1	anthrax toxin receptor 1
9.92e-13	10896380	Emc2	ER membrane protein complex subunit 2
1.07e-12	10928855	Tns1	tensin 1
1.07e-12	10788720	N/A
1.1e-12	10714276	Trpm6	transient receptor potential cation channel, subfamily M, member 6
1.12e-12	10916804	N/A
1.14e-12	10816901	Nup210l	nucleoporin 210-like
1.16e-12	10782509	Nek10	NIMA-related kinase 10
1.17e-12	10880408	Hmgn2	high mobility group nucleosome binding domain 2
1.19e-12	10830253	Dse	dermatan sulfate epimerase
1.19e-12	10848393	Rasgrp1	RAS guanyl releasing protein 1 (calcium and DAG-regulated)
1.19e-12	10749797	Wdr45b	WD repeat domain 45B
1.21e-12	10907763	Uhrf1bp1l	UHRF1 binding protein 1-like
1.23e-12	10761965	N/A
1.24e-12	10890441	Pygl	phosphorylase, glycogen, liver
1.25e-12	10899055	Tuba1c	tubulin, alpha 1C
1.26e-12	10753279	Erg	v-ets avian erythroblastosis virus E26 oncogene
1.32e-12	10771535	Antxr2	anthrax toxin receptor 2
1.36e-12	10890886	Zfp36l1	zinc finger protein 36, C3H type-like 1
1.37e-12	10855075	Tas2r143	taste receptor, type 2, member 143
1.37e-12	10828229	C4b; C4a; LOC103689965	complement component 4B (Chido blood group); complement component 4A (Rodgers blood group); complement C4-like
1.37e-12	10752754	Nrip1	nuclear receptor interacting protein 1
1.42e-12	10908896	Ets1	v-ets avian erythroblastosis virus E26 oncogene homolog 1
1.46e-12	10931222	Adgre1	adhesion G protein-coupled receptor E1
1.54e-12	10726682	Ifitm3	interferon induced transmembrane protein 3
1.55e-12	10940661	N/A
1.59e-12	10862031	Slc37a3	solute carrier family 37, member 3
1.63e-12	10802619	LOC102557597	uncharacterized LOC102557597
1.65e-12	10917116	Zbtb16	zinc finger and BTB domain containing 16
1.79e-12	10779839	Rnase6	ribonuclease, RNase A family, 6
1.8e-12	10855079	Tas2r126	taste receptor, type 2, member 126
1.8e-12	10921166	Ccr1l1	chemokine (C-C motif) receptor 1-like 1
1.84e-12	10862131	Clec5a	C-type lectin domain family 5, member A
1.85e-12	10724042	P2ry2	purinergic receptor P2Y, G-protein coupled, 2
1.86e-12	10753784	Ift57	intraflagellar transport 57
1.94e-12	10718600	Mir291a	microRNA 291a
1.96e-12	10932016	Sept6; Nkrf	septin 6; NFKB repressing factor
1.97e-12	10926091	N/A
1.99e-12	10887239	Tecpr2	tectonin beta-propeller repeat containing 2
2.04e-12	10827796	RT1-N3	RT1 class Ib, locus N3
2.05e-12	10920390	Camp	cathelicidin antimicrobial peptide
2.12e-12	10807688	Zfhx3	zinc finger homeobox 3
2.13e-12	10729269	Anxa1	annexin A1
2.14e-12	10866091	LOC690020	similar to killer cell lectin-like receptor, subfamily A, member 17
2.21e-12	10784412	LOC102554746	uncharacterized LOC102554746
2.27e-12	10879483	Rlf; RGD1560700	rearranged L-myc fusion; similar to palmitoyl-protein thioesterase
2.32e-12	10743357	N/A
2.4e-12	10764661	Fam129a	family with sequence similarity 129, member A
2.42e-12	10918569	Aqp9	aquaporin 9
2.43e-12	10820098	N/A
2.44e-12	10703662	N/A
2.47e-12	10868923	Tgfbr1	transforming growth factor, beta receptor 1
2.48e-12	10864942	Bms1	BMS1 ribosome biogenesis factor
2.54e-12	10786640	Tnnc1	troponin C type 1 (slow)
2.55e-12	10919637	Tf	transferrin
2.61e-12	10816153	Tmem154	transmembrane protein 154
2.62e-12	10919010	Hmgn3	high mobility group nucleosomal binding domain 3
2.62e-12	10812775	Cd180	CD180 molecule
2.66e-12	10922113	Paqr8; Efhc1	progestin and adipoQ receptor family member VIII; EF-hand domain (C-terminal) containing 1
2.69e-12	10776778	N4bp2	NEDD4 binding protein 2
2.8e-12	10802621	Mbd1	methyl-CpG binding domain protein 1
2.8e-12	10804935	Alpk2	alpha-kinase 2
2.9e-12	10855062	Zyx	zyxin
2.99e-12	10816204	Lrba	LPS-responsive vesicle trafficking, beach and anchor containing
3.04e-12	10935255	LOC681300; Cxxc5	similar to CXXC finger 5; CXXC finger protein 5 [Source:RGD Symbol;Acc:1359466]
3.17e-12	10832829	Jmjd1c	jumonji domain containing 1C
3.33e-12	10719593	Bcl3; Ceacam16; Ceacam19	B-cell CLL/lymphoma 3; carcinoembryonic antigen-related cell adhesion molecule 16; carcinoembryonic antigen-related cell adhesion molecule 19
3.41e-12	10752744	Samsn1	SAM domain, SH3 domain and nuclear localization signals, 1
3.56e-12	10832831	Jmjd1c	jumonji domain containing 1C
3.69e-12	10866413	Gprc5d	G protein-coupled receptor, class C, group 5, member D
3.74e-12	10819052	Lef1	lymphoid enhancer binding factor 1
3.84e-12	10729209	Gcnt1	glucosaminyl (N-acetyl) transferase 1, core 2
3.85e-12	10704996	Ethe1	ethylmalonic encephalopathy 1
3.85e-12	10808085	Znrf1	zinc and ring finger 1, E3 ubiquitin protein ligase
3.89e-12	10879134	Ptprf	protein tyrosine phosphatase, receptor type, F
4.12e-12	10774163	LOC688553	hypothetical protein LOC688553
4.39e-12	10811751	Vps9d1	VPS9 domain containing 1
4.41e-12	10833180	Srgn	serglycin
4.52e-12	10850257	LOC100361388	high-mobility group nucleosomal binding domain 2-like [Source:RGD Symbol;Acc:2320277]
4.57e-12	10746905	Ikzf3	IKAROS family zinc finger 3
4.65e-12	10932164	Mir221	microRNA 221
4.77e-12	10740442	Ciita	class II, major histocompatibility complex, transactivator
4.8e-12	10750211	Ifngr2	interferon gamma receptor 2
4.82e-12	10862867	Gadd45a	growth arrest and DNA-damage-inducible, alpha
4.87e-12	10766170	Parp1	poly (ADP-ribose) polymerase 1
4.88e-12	10729460	Fam122a	family with sequence similarity 122A
4.91e-12	10917385	Atm	ATM serine/threonine kinase
5.06e-12	10763935	Pik3c2b	phosphatidylinositol-4-phosphate 3-kinase, catalytic subunit type 2 beta
5.12e-12	10926967	LOC501110	similar to Glutathione S-transferase A1 (GTH1) (HA subunit 1) (GST-epsilon) (GSTA1-1) (GST class-alpha)
5.12e-12	10934635	P2ry10	purinergic receptor P2Y, G-protein coupled, 10
5.14e-12	10701924	Ifngr1	interferon gamma receptor 1
5.18e-12	10749484	Timp2	TIMP metallopeptidase inhibitor 2
5.3e-12	10876838	Klf4	Kruppel-like factor 4 (gut)
5.46e-12	10732966	Adam19; Sox30	ADAM metallopeptidase domain 19; SRY (sex determining region Y)-box 30
5.71e-12	10822830	Qrfpr	pyroglutamylated RFamide peptide receptor
5.81e-12	10806806	Adgre5	adhesion G protein-coupled receptor E5
5.84e-12	10862283	Olr802	olfactory receptor 802
6.1e-12	10804486	Cep120	centrosomal protein 120
6.18e-12	10711268	Itgam	integrin, alpha M
6.24e-12	10924177	Xrcc5	X-ray repair complementing defective repair in Chinese hamster cells 5
6.43e-12	10908452	LOC691141	hypothetical protein LOC691141
6.68e-12	10750672	St3gal6	ST3 beta-galactoside alpha-2,3-sialyltransferase 6
6.68e-12	10859337	Pde6h	phosphodiesterase 6H, cGMP-specific, cone, gamma
6.95e-12	10837794	Spi1	Spi-1 proto-oncogene
6.98e-12	10720797	Cd22	CD22 molecule
7.31e-12	10776026	Dck	deoxycytidine kinase
7.39e-12	10871103	Efcab14	EF-hand calcium binding domain 14
7.39e-12	10825153	Fcgr1a	Fc fragment of IgG, high affinity Ia, receptor (CD64)
7.86e-12	10724575	Gvinp1	GTPase, very large interferon inducible 1
8.12e-12	10828351	RT1-Ba	RT1 class II, locus Ba
8.29e-12	10904653	Naprt	nicotinate phosphoribosyltransferase
8.3e-12	10815636	Mbnl1	muscleblind-like splicing regulator 1
8.7e-12	10723092	Fes	FES proto-oncogene, tyrosine kinase
8.78e-12	10907122	Fmnl3	formin-like 3
8.81e-12	10742348	Irgm	immunity-related GTPase family, M
8.83e-12	10781960	N/A
8.85e-12	10903979	Fam84b	family with sequence similarity 84, member B
9.18e-12	10740408	Snn	stannin
9.4e-12	10830624	Cd24	CD24 molecule
9.49e-12	10724993	Rras2	related RAS viral (r-ras) oncogene homolog 2
9.49e-12	10856265	Cd8b	CD8b molecule
9.66e-12	10904597	Ly6al	lymphocyte antigen 6 complex, locus A-like
9.67e-12	10940690	N/A
9.76e-12	10841489	Phf20	PHD finger protein 20
9.78e-12	10832680	Ipmk	inositol polyphosphate multikinase
9.83e-12	10869165	Zfp462	zinc finger protein 462
9.9e-12	10934639	Gpr174	G protein-coupled receptor 174
9.95e-12	10894498	Rtcb	RNA 2,3-cyclic phosphate and 5-OH ligase
9.99e-12	10742494	Rmnd5b	required for meiotic nuclear division 5 homolog B (S. cerevisiae)
1e-11	10705539	Gmfg	glia maturation factor, gamma
1.01e-11	10749757	Cd7	Cd7 molecule
1.01e-11	10889339	Adam17	ADAM metallopeptidase domain 17
1.03e-11	10858967	Tnfrsf1a	tumor necrosis factor receptor superfamily, member 1a
1.03e-11	10862262	Epha1	Eph receptor A1
1.03e-11	10917366	Ddx10	DEAD (Asp-Glu-Ala-Asp) box polypeptide 10
1.09e-11	10781496	Lcp1	lymphocyte cytosolic protein 1
1.12e-11	10925185	Mroh2a	maestro heat-like repeat family member 2A; maestro heat-like repeat family member 2A [Source:MGI Symbol;Acc:MGI:3705228]
1.13e-11	10707386	LOC100911716	rho-related GTP-binding protein RhoQ-like
1.13e-11	10865349	Slc2a3	solute carrier family 2 (facilitated glucose transporter), member 3
1.14e-11	10868017	Lyrm2; Mdn1	LYR motif containing 2; midasin homolog (yeast)
1.15e-11	10914011	Cmtm6	CKLF-like MARVEL transmembrane domain containing 6
1.17e-11	10870490	Usp24	ubiquitin specific peptidase 24
1.2e-11	10858702	Spsb2	splA/ryanodine receptor domain and SOCS box containing 2
1.21e-11	10845767	Cobll1	cordon-bleu WH2 repeat protein-like 1
1.23e-11	10928275	Fam126b	family with sequence similarity 126, member B
1.27e-11	10775628	Anxa3	annexin A3
1.28e-11	10936827	Atp6ap2	ATPase, H+ transporting, lysosomal accessory protein 2
1.29e-11	10734673	Gas7	growth arrest specific 7
1.32e-11	10859392	Mgst1	microsomal glutathione S-transferase 1
1.41e-11	10920556	Rtp3	receptor (chemosensory) transporter protein 3
1.48e-11	10763149	Oas2	2-5 oligoadenylate synthetase 2
1.54e-11	10938384	Pdk3	pyruvate dehydrogenase kinase, isozyme 3
1.55e-11	10766953	Bcl2	B-cell CLL/lymphoma 2
1.55e-11	10713222	Ehd1; Atg2a; Mir192; Mir194-2	EH-domain containing 1; autophagy related 2A; microRNA 192; microRNA 194-2
1.55e-11	10776774	Rhoh	ras homolog family member H
1.61e-11	10796476	Mrc1	mannose receptor, C type 1
1.64e-11	10853819	Met	MET proto-oncogene, receptor tyrosine kinase
1.64e-11	10718311	Prdm9	PR domain containing 9
1.66e-11	10718598	Mir292	microRNA 292
1.67e-11	10866019	Clec7a	C-type lectin domain family 7, member A
1.77e-11	10729793	Ifit1bl	interferon-induced protein with tetratricopeptide repeats 1B-like
1.78e-11	10931717	C3	complement component 3
1.78e-11	10858784	Chd4	chromodomain helicase DNA binding protein 4
1.81e-11	10774596	Bcl11a	B-cell CLL/lymphoma 11A (zinc finger protein)
1.86e-11	10754426	Parp9	poly (ADP-ribose) polymerase family, member 9
1.94e-11	10890860	Actn1	actinin, alpha 1
2.01e-11	10751498	Pdia5	protein disulfide isomerase family A, member 5
2.04e-11	10882709	Prkce	protein kinase C, epsilon
2.09e-11	10849700	Mal	mal, T-cell differentiation protein
2.16e-11	10769016	Ralgps2	Ral GEF with PH domain and SH3 binding motif 2
2.2e-11	10857984	Pparg	peroxisome proliferator-activated receptor gamma
2.21e-11	10890745	Max	MYC associated factor X
2.21e-11	10901289	Tmem263	transmembrane protein 263
2.23e-11	10908521	Ldlr	low density lipoprotein receptor
2.25e-11	10737740	Skap1	src kinase associated phosphoprotein 1
2.29e-11	10777770	Tacc3	transforming, acidic coiled-coil containing protein 3
2.42e-11	10751086	LOC685767	similar to OX-2 membrane glycoprotein precursor (MRC OX-2 antigen) (CD200 antigen)
2.45e-11	10820145	Adgrv1	adhesion G protein-coupled receptor V1
2.45e-11	10801606	Dmxl1	Dmx-like 1
2.47e-11	10822330	Zbtb10	zinc finger and BTB domain containing 10
2.51e-11	10940569	N/A
2.55e-11	10787162	Eps15l1	epidermal growth factor receptor pathway substrate 15-like 1
2.59e-11	10729074	Tle4	transducin-like enhancer of split 4
2.62e-11	10801973	RGD1309362	similar to interferon-inducible GTPase
2.68e-11	10799516	Usp6nl	USP6 N-terminal like
2.75e-11	10845470	Baz2b	bromodomain adjacent to zinc finger domain, 2B
2.76e-11	10768412	Prg4	proteoglycan 4
2.9e-11	10897419	Ncf4	neutrophil cytosolic factor 4
2.97e-11	10817071	S100a8	S100 calcium binding protein A8
2.98e-11	10762740	Oasl	2-5-oligoadenylate synthetase-like
3.01e-11	10745424	Ssh2	slingshot protein phosphatase 2
3.06e-11	10772729	Rfc1	replication factor C (activator 1) 1
3.18e-11	10920770	Ano10	anoctamin 10
3.23e-11	10940630	N/A
3.46e-11	10798199	Mboat1	membrane bound O-acyltransferase domain containing 1
3.5e-11	10714020	Ms4a6a	membrane-spanning 4-domains, subfamily A, member 6A
3.52e-11	10847903	Hipk3	homeodomain interacting protein kinase 3
3.55e-11	10866819	Bcat1	branched chain amino acid transaminase 1, cytosolic
3.71e-11	10886629	Rpl6-ps1; Rpl6	ribosomal protein L6, pseudogene 1; ribosomal protein L6
3.73e-11	10804086	Arap3	ArfGAP with RhoGAP domain, ankyrin repeat and PH domain 3
3.84e-11	10881293	Pdpn	podoplanin
4.01e-11	10940575	N/A
4.07e-11	10768814	Ier5	immediate early response 5
4.08e-11	10772342	Fryl	FRY-like
4.18e-11	10932139	Slc9a7	solute carrier family 9, subfamily A (NHE7, cation proton antiporter 7), member 7
4.21e-11	10884772	LOC100912115	cutaneous T-cell lymphoma-associated antigen 5 homolog
4.24e-11	10715546	Scd2	stearoyl-Coenzyme A desaturase 2
4.3e-11	10893067	Stat2	signal transducer and activator of transcription 2
4.42e-11	10905530	Rpl3	ribosomal protein L3
4.42e-11	10714353	Tmem2	transmembrane protein 2
4.43e-11	10777242	Bst1	bone marrow stromal cell antigen 1
4.46e-11	10831574	RT1-DOb	RT1 class II, locus DOb
4.47e-11	10925753	RGD1562136	similar to D1Ertd622e protein
4.47e-11	10810631	Tppp3	tubulin polymerization-promoting protein family member 3
4.48e-11	10918620	Tcf12	transcription factor 12
4.51e-11	10814561	Pld1	phospholipase D1, phosphatidylcholine-specific
4.51e-11	10800814	Camk4	calcium/calmodulin-dependent protein kinase IV
4.54e-11	10892950	Naca	nascent polypeptide-associated complex alpha subunit
4.59e-11	10929536	Slc16a14	solute carrier family 16, member 14
4.6e-11	10829703	Tfam	transcription factor A, mitochondrial
4.69e-11	10760920	LOC681069; LOC681341; LOC681182	similar to paired immunoglobin-like type 2 receptor beta; similar to paired immunoglobin-like type 2 receptor beta [Source:RGD Symbol;Acc:1583509]
4.7e-11	10803991	Cd14	CD14 molecule
4.71e-11	10889772	Stxbp6	syntaxin binding protein 6 (amisyn)
4.96e-11	10900974	Akap8	A kinase (PRKA) anchor protein 8
5.02e-11	10756877	Card11	caspase recruitment domain family, member 11
5.03e-11	10765186	Sell	selectin L
5.07e-11	10901436	Eid3	EP300 interacting inhibitor of differentiation 3
5.15e-11	10847308	Madd	MAP-kinase activating death domain
5.15e-11	10757862	Gtf2i	general transcription factor II I
5.2e-11	10733790	Igtp; Irgm2	interferon gamma induced GTPase; immunity-related GTPase family M member 2
5.4e-11	10894167	Cyp4f39	cytochrome P450, family 4, subfamily f, polypeptide 39
5.52e-11	10909470	Dpagt1	dolichyl-phosphate (UDP-N-acetylglucosamine) N-acetylglucosaminephosphotransferase 1 (GlcNAc-1-P transferase)
5.54e-11	10708587	LOC103691190	uncharacterized LOC103691190
5.56e-11	10795574	Arhgap12	Rho GTPase activating protein 12
5.61e-11	10797929	Gcnt2	glucosaminyl (N-acetyl) transferase 2, I-branching enzyme
5.63e-11	10728766	Cd5	Cd5 molecule
5.67e-11	10751931	Bcl6	B-cell CLL/lymphoma 6
5.86e-11	10717891	Ezr	ezrin
5.88e-11	10869249	Gng10	guanine nucleotide binding protein (G protein), gamma 10
5.9e-11	10780919	Arl11	ADP-ribosylation factor-like 11
5.96e-11	10855077	Tas2r135	taste receptor, type 2, member 135
5.97e-11	10769782	LOC686035	similar to heat shock 70kDa protein 6 (HSP70B)
6e-11	10797597	Iars	isoleucyl-tRNA synthetase
6.01e-11	10702250	Enpp1	ectonucleotide pyrophosphatase/phosphodiesterase 1
6.29e-11	10774605	Bcl11a	B-cell CLL/lymphoma 11A (zinc finger protein)
6.37e-11	10801650	Tnfaip8	tumor necrosis factor, alpha-induced protein 8
6.41e-11	10768697	Dhx9	DEAH (Asp-Glu-Ala-His) box helicase 9
6.43e-11	10723928	Spcs2	signal peptidase complex subunit 2
6.46e-11	10917518	Dmxl2	Dmx-like 2
6.63e-11	10909918	Ppp2r1b	protein phosphatase 2, regulatory subunit A, beta
6.63e-11	10836019	Kynu	kynureninase
6.69e-11	10823783	Fnip2	folliculin interacting protein 2
6.75e-11	10798027	Ly86	lymphocyte antigen 86
6.76e-11	10746819	Arl5c	ADP-ribosylation factor-like 5C
6.8e-11	10740381	Snx29	sorting nexin 29
7.32e-11	10842475	Ptpn1	protein tyrosine phosphatase, non-receptor type 1
7.33e-11	10771492	Rasgef1b	RasGEF domain family, member 1B
7.44e-11	10940677	N/A
7.46e-11	10825495	Slc22a15	solute carrier family 22, member 15
7.49e-11	10896042	Mtdh	metadherin
7.51e-11	10883609	Smc6	structural maintenance of chromosomes 6
7.57e-11	10818983	Tifa	TRAF-interacting protein with forkhead-associated domain
7.62e-11	10845508	Cd302	CD302 molecule
7.63e-11	10788899	Adam9	ADAM metallopeptidase domain 9
7.64e-11	10923595	Casp8	caspase 8
7.98e-11	10744460	Cxcl16	chemokine (C-X-C motif) ligand 16
8.13e-11	10708565	Picalm	phosphatidylinositol binding clathrin assembly protein
8.14e-11	10830216	Pkib	protein kinase (cAMP-dependent, catalytic) inhibitor beta
8.2e-11	10736784	Slfn5	schlafen family member 5
8.26e-11	10837366	Slc43a3	solute carrier family 43, member 3
8.53e-11	10908482	Smarca4	SWI/SNF related, matrix associated, actin dependent regulator of chromatin, subfamily a, member 4
8.58e-11	10776835	Wdr19	WD repeat domain 19
8.65e-11	10763375	Serpinb10	serpin peptidase inhibitor, clade B (ovalbumin), member 10
8.67e-11	10796198	Taf3; Atp5c1	TAF3 RNA polymerase II, TATA box binding protein (TBP)-associated factor; ATP synthase, H+ transporting, mitochondrial F1 complex, gamma polypeptide 1
8.7e-11	10864838	N/A
8.84e-11	10872561	Zdhhc18	zinc finger, DHHC-type containing 18
8.95e-11	10720965	Uba2; Uba2-ps1	ubiquitin-like modifier activating enzyme 2; ubiquitin-like modifier activating enzyme 2, pseudogene 1
8.96e-11	10793597	LOC102551150	zinc finger protein 845-like
9.21e-11	10745670	Ccl6	chemokine (C-C motif) ligand 6
9.27e-11	10731891	Nlrc3	NLR family, CARD domain containing 3
9.37e-11	10751896	Cldn1	claudin 1
9.4e-11	10826680	Alpk1	alpha-kinase 1
9.48e-11	10770396	Lbr	lamin B receptor [Source:MGI Symbol;Acc:MGI:2138281]
9.48e-11	10792163	Eif4ebp1	eukaryotic translation initiation factor 4E binding protein 1
9.63e-11	10743966	Kdm6b	lysine (K)-specific demethylase 6B
9.92e-11	10765497	Fcgr3a	Fc fragment of IgG, low affinity IIIa, receptor
1e-10	10879555	Macf1	microtubule-actin crosslinking factor 1
1e-10	10930411	Tgif1	TGFB-induced factor homeobox 1
1.01e-10	10750193	Il10rb	interleukin 10 receptor, beta
1.03e-10	10864711	LOC103695231	uncharacterized LOC103695231
1.03e-10	10781962	LOC102557368; LOC103695231	uncharacterized LOC102557368; uncharacterized LOC103695231
1.06e-10	10855512	Mpp6	membrane protein, palmitoylated 6 (MAGUK p55 subfamily member 6)
1.07e-10	10763889	Nuak2	NUAK family, SNF1-like kinase, 2
1.07e-10	10919389	Rasa2	RAS p21 protein activator 2
1.09e-10	10888662	Wdr43	WD repeat domain 43
1.11e-10	10887647	Ighg; RGD1565478	Immunoglobulin heavy chain (gamma polypeptide); similar to Immunoglobulin heavy chain (gamma polypeptide)
1.11e-10	10718591	Myadm	myeloid-associated differentiation marker
1.14e-10	10882933	Xdh	xanthine dehydrogenase
1.14e-10	10762747	Oasl2	2-5 oligoadenylate synthetase-like 2
1.15e-10	10753861	Retnlg	resistin-like gamma
1.17e-10	10732207	Msrb1	methionine sulfoxide reductase B1
1.18e-10	10925324	Lrrfip1	leucine rich repeat (in FLII) interacting protein 1
1.18e-10	10842315	Ncoa3	nuclear receptor coactivator 3
1.19e-10	10803001	Zfp516	zinc finger protein 516
1.21e-10	10716335	Atrnl1	attractin like 1
1.22e-10	10762217	Rpl6	ribosomal protein L6
1.27e-10	10860820	Hepacam2	HEPACAM family member 2
1.28e-10	10810867	Nqo1	NAD(P)H dehydrogenase, quinone 1
1.28e-10	10904812	Plec	plectin
1.3e-10	10787491	Ifi30	interferon gamma inducible protein 30
1.31e-10	10866167	Ly49i4; Ly49i3; Ly49s3; Ly49s4; Ly49s6	Ly49 inhibitory receptor 4; immunoreceptor Ly49i3; Ly-49 stimulatory receptor 3; Ly49 stimulatory receptor 4; Ly49 stimulatory receptor 6
1.32e-10	10803681	Stard4	StAR-related lipid transfer (START) domain containing 4
1.32e-10	10865585	Cd4	Cd4 molecule
1.33e-10	10720215	Zfp36	zinc finger protein 36
1.33e-10	10743914	Chd3	chromodomain helicase DNA binding protein 3
1.35e-10	10747024	Ccr7	chemokine (C-C motif) receptor 7
1.35e-10	10914571	Limd1	LIM domains containing 1
1.36e-10	10897054	Ly6e	lymphocyte antigen 6 complex, locus E
1.36e-10	10901823	Tmpo	thymopoietin
1.36e-10	10862281	Olr801	olfactory receptor 801
1.39e-10	10859880	Insig1	insulin induced gene 1
1.44e-10	10724637	LOC499235	LRRGT00141
1.48e-10	10820548	Aggf1	angiogenic factor with G patch and FHA domains 1
1.49e-10	10760877	RGD1305455	similar to hypothetical protein FLJ10925
1.49e-10	10771287	Wdfy3	WD repeat and FYVE domain containing 3
1.5e-10	10770685	Rps6kc1	ribosomal protein S6 kinase, polypeptide C1
1.52e-10	10933755	Tbl1x	transducin (beta)-like 1 X-linked
1.55e-10	10744568	C1qbp	complement component 1, q subcomponent binding protein
1.55e-10	10752007	Dgkg	diacylglycerol kinase, gamma
1.57e-10	10856053	Serbp1	Serpine1 mRNA binding protein 1
1.58e-10	10729780	Lipa	lipase A, lysosomal acid, cholesterol esterase
1.59e-10	10898192	Tspo	translocator protein
1.62e-10	10764358	Zfp281	zinc finger protein 281
1.67e-10	10940494	N/A
1.7e-10	10756129	Cd209c	CD209c molecule
1.73e-10	10856320	Polr1a	polymerase (RNA) I polypeptide A
1.74e-10	10898676	Lrrk2	leucine-rich repeat kinase 2
1.76e-10	10781467	Htr2a	5-hydroxytryptamine (serotonin) receptor 2A, G protein-coupled
1.77e-10	10808362	Usp10	ubiquitin specific peptidase 10
1.77e-10	10752244	N/A
1.78e-10	10871521	Slc2a1	solute carrier family 2 (facilitated glucose transporter), member 1
1.83e-10	10730659	Sh3pxd2a	SH3 and PX domains 2A
1.84e-10	10735455	Mybbp1a	MYB binding protein (P160) 1a
1.86e-10	10758156	Ncor2	nuclear receptor co-repressor 2
1.86e-10	10706650	Pnkp	polynucleotide kinase 3-phosphatase
1.87e-10	10796564	Plxdc2	plexin domain containing 2
1.9e-10	10750876	Hmgb2l1; Hmgb2	high mobility group box 2-like 1; high mobility group box 2
2e-10	10883636	Fam49a	family with sequence similarity 49, member A
2.05e-10	10710051	Far1	fatty acyl CoA reductase 1
2.09e-10	10885417	Plekhg3	pleckstrin homology domain containing, family G (with RhoGef domain) member 3
2.12e-10	10774345	Spred2	sprouty-related, EVH1 domain containing 2
2.14e-10	10915648	Rab3d	RAB3D, member RAS oncogene family
2.15e-10	10819232	Ube2d3	ubiquitin-conjugating enzyme E2D 3
2.16e-10	10882317	Isg15	ISG15 ubiquitin-like modifier
2.17e-10	10796111	Fbxo18	F-box protein, helicase, 18
2.17e-10	10924286	Slc11a1	solute carrier family 11 (proton-coupled divalent metal ion transporter), member 1
2.2e-10	10784227	Setdb2	SET domain, bifurcated 2
2.2e-10	10907689	Itga5	integrin, alpha 5 (fibronectin receptor, alpha polypeptide)
2.26e-10	10851263	Samhd1	SAM domain and HD domain, 1
2.32e-10	10705712	Rasgrp4	RAS guanyl releasing protein 4
2.34e-10	10768560	Rnf2	ring finger protein 2
2.37e-10	10831090	Clic1	chloride intracellular channel 1
2.38e-10	10817686	Fmo5	flavin containing monooxygenase 5
2.38e-10	10852600	Rgs19	regulator of G-protein signaling 19
2.4e-10	10881671	Pgd; Kif1b	phosphogluconate dehydrogenase; kinesin family member 1B
2.41e-10	10798175	Irf4	interferon regulatory factor 4
2.41e-10	10776239	Stap1	signal transducing adaptor family member 1
2.44e-10	10793748	Golm1; Spata31d3	golgi membrane protein 1; SPATA31 subfamily D, member 3
2.49e-10	10927678	N/A
2.49e-10	10889064	Seli	selenoprotein I
2.51e-10	10769897	Ly9	lymphocyte antigen 9
2.54e-10	10887939	Cdc42ep3	CDC42 effector protein (Rho GTPase binding) 3
2.55e-10	10904948	Dgat1	diacylglycerol O-acyltransferase 1
2.58e-10	10784049	Gzmbl3; Gzmb	Granzyme B-like 3; granzyme B (granzyme 2, cytotoxic T-lymphocyte-associated serine esterase 1)
2.62e-10	10716080	Dusp5	dual specificity phosphatase 5
2.64e-10	10917617	Nrg4	neuregulin 4
2.64e-10	10838497	Katnbl1	katanin p80 subunit B-like 1
2.67e-10	10857473	Ppp4r2	protein phosphatase 4, regulatory subunit 2
2.69e-10	10733750	Larp1	La ribonucleoprotein domain family, member 1
2.71e-10	10905560	Mkl1	megakaryoblastic leukemia (translocation) 1
2.72e-10	10836010	Arpc5l	actin related protein 2/3 complex, subunit 5-like
2.74e-10	10716667	Ust	uronyl-2-sulfotransferase
2.76e-10	10753075	Synj1	synaptojanin 1
2.8e-10	10892493	N/A
2.84e-10	10765994	Uba2; Uba2-ps1	ubiquitin-like modifier activating enzyme 2; ubiquitin-like modifier activating enzyme 2, pseudogene 1
2.86e-10	10756154	Cd209e	CD209e molecule
2.9e-10	10751586	Umps	uridine monophosphate synthetase
2.91e-10	10892109	Bcl11b	B-cell CLL/lymphoma 11B (zinc finger protein)
2.91e-10	10916187	Ccdc15	coiled-coil domain containing 15
2.94e-10	10781426	Rcbtb2	regulator of chromosome condensation (RCC1) and BTB (POZ) domain containing protein 2
3e-10	10830398	Traf3ip2	Traf3 interacting protein 2
3.11e-10	10887657	Ighg	Immunoglobulin heavy chain (gamma polypeptide)
3.11e-10	10889649	Hdac9	histone deacetylase 9
3.13e-10	10798952	Ccny	cyclin Y
3.14e-10	10706705	Rras	related RAS viral (r-ras) oncogene homolog
3.17e-10	10723850	Uvrag	UV radiation resistance associated gene
3.19e-10	10933733	LOC317456	hypothetical LOC317456
3.22e-10	10919283	Tbc1d2b	TBC1 domain family, member 2B
3.22e-10	10781722	Olfm4	olfactomedin 4
3.31e-10	10854863	LOC100911271; Trbv19; Trbv1; Trbv13-3; Trbv13-2	uncharacterized LOC100911271 [Source:RGD Symbol;Acc:6493911]; T cell receptor beta, variable 19 [Source:MGI Symbol;Acc:MGI:98604]; T cell receptor beta, variable 1 [Source:MGI Symbol;Acc:MGI:98594]; T cell receptor beta, variable 13-3 [Source:MGI Symbol;Acc:MGI:98607]; T cell receptor beta, variable 13-2 [Source:MGI Symbol;Acc:MGI:98608]
3.33e-10	10900721	Arid3a	AT rich interactive domain 3A (Bright like)
3.33e-10	10800783	Tslp	thymic stromal lymphopoietin
3.37e-10	10888608	Lbh	limb bud and heart development
3.38e-10	10743964	N/A
3.39e-10	10884996	Abhd12b	abhydrolase domain containing 12B
3.41e-10	10826846	Sgms2	sphingomyelin synthase 2
3.49e-10	10846185	Gpr155	G protein-coupled receptor 155
3.63e-10	10799087	Heatr1	HEAT repeat containing 1
3.65e-10	10783210	LOC100361866	eosinophil cationic protein-like
3.77e-10	10784454	Fdft1	farnesyl diphosphate farnesyl transferase 1
3.81e-10	10739915	Pgs1	phosphatidylglycerophosphate synthase 1
3.86e-10	10780433	Irf9	interferon regulatory factor 9
3.9e-10	10731444	Rsl1d1	ribosomal L1 domain containing 1
4.03e-10	10916000	Fli1	Fli-1 proto-oncogene, ETS transcription factor
4.05e-10	10822386	Pkia	protein kinase (cAMP-dependent, catalytic) inhibitor alpha
4.05e-10	10788483	Lonrf1	LON peptidase N-terminal domain and ring finger 1
4.06e-10	10843959	Vav2	vav 2 guanine nucleotide exchange factor
4.06e-10	10831551	RT1-Db2	RT1 class II, locus Db2
4.07e-10	10871173	Nsun4	NOP2/Sun domain family, member 4
4.08e-10	10894549	Ckap4	cytoskeleton-associated protein 4
4.08e-10	10741851	Ergic1	endoplasmic reticulum-golgi intermediate compartment 1
4.09e-10	10743593	Lrrc75a	leucine rich repeat containing 75A
4.1e-10	10707832	Chsy1	chondroitin sulfate synthase 1
4.16e-10	10889560	Bcap29	B-cell receptor-associated protein 29
4.39e-10	10909407	Thy1	Thy-1 cell surface antigen
4.4e-10	10887120	Ppp2r5c	protein phosphatase 2, regulatory subunit B, gamma
4.43e-10	10796615	Bmi1	BMI1 proto-oncogene, polycomb ring finger
4.43e-10	10788824	Ddhd2	DDHD domain containing 2
4.44e-10	10924672	Acsl3	acyl-CoA synthetase long-chain family member 3
4.49e-10	10825464	Cd2	Cd2 molecule
4.5e-10	10900592	Midn	midnolin
4.54e-10	10706586	Napsa	napsin A aspartic peptidase
4.57e-10	10777832	Depdc5	DEP domain containing 5
4.58e-10	10940673	N/A
4.58e-10	10820586	F2r	coagulation factor II (thrombin) receptor
4.59e-10	10880107	N/A
4.59e-10	10715962	Slk	STE20-like kinase
4.61e-10	10778327	Myo1g	myosin IG
4.66e-10	10895581	LOC689014	similar to CG9987-PA
4.67e-10	10846158	Ola1	Obg-like ATPase 1
4.68e-10	10791144	Gmip	Gem-interacting protein
4.69e-10	10835355	Ass1	argininosuccinate synthase 1
4.72e-10	10823591	Trim59	tripartite motif-containing 59
4.77e-10	10862818	Gprin3	GPRIN family member 3
4.8e-10	10801734	Snx2	sorting nexin 2
4.81e-10	10880095	Serinc2	serine incorporator 2
4.82e-10	10837138	Itga4	integrin, alpha 4
4.88e-10	10924853	Itm2c	integral membrane protein 2C
4.88e-10	10879446	Exo5	exonuclease 5
4.97e-10	10934637	RGD1560455	similar to RIKEN cDNA A630033H20 gene
4.98e-10	10868000	Bach2	BTB and CNC homology 1, basic leucine zipper transcription factor 2
5.04e-10	10907198	Cers5	ceramide synthase 5
5.05e-10	10889360	Ywhaq	tyrosine 3-monooxygenase/tryptophan 5-monooxygenase activation protein, theta
5.09e-10	10776978	Pcdh7	protocadherin 7
5.14e-10	10896966	Dennd3	DENN/MADD domain containing 3
5.15e-10	10739958	Rnf213	ring finger protein 213
5.17e-10	10896836	Efr3a	EFR3 homolog A
5.21e-10	10934071	Mir223	microRNA 223
5.27e-10	10784307	Nup58	nucleoporin 58
5.27e-10	10701880	Reps1	RALBP1 associated Eps domain containing 1
5.28e-10	10866252	Klra1	killer cell lectin-like receptor, subfamily A, member 1
5.3e-10	10767373	Cxcr4	chemokine (C-X-C motif) receptor 4
5.34e-10	10773168	RGD1561694	similar to High mobility group protein 2 (HMG-2) [Source:RGD Symbol;Acc:1561694]
5.45e-10	10892499	Lrp3; Ighg	low density lipoprotein receptor-related protein 3; Immunoglobulin heavy chain (gamma polypeptide)
5.56e-10	10917870	Pml	promyelocytic leukemia
5.58e-10	10810378	Inpp4b	inositol polyphosphate-4-phosphatase, type II
5.59e-10	10910204	Pstpip1	proline-serine-threonine phosphatase-interacting protein 1
5.61e-10	10863269	Tgoln2	trans-golgi network protein 2
5.64e-10	10910071	Idh3a	isocitrate dehydrogenase 3 (NAD+) alpha
5.67e-10	10922857	Il1rl1	interleukin 1 receptor-like 1
5.67e-10	10895397	Nap1l1	nucleosome assembly protein 1-like 1
5.7e-10	10780094	LOC290071	similar to T cell receptor V-alpha J-alpha
5.74e-10	10763547	Tmem185b	transmembrane protein 185B
5.75e-10	10725245	Coq7	coenzyme Q7 homolog, ubiquinone (yeast)
5.91e-10	10916946	Cd3g	CD3 molecule, gamma
5.94e-10	10723196	LOC100909455; Crtc3	CREB-regulated transcription coactivator 3-like; CREB regulated transcription coactivator 3
6.05e-10	10854645	Tbxas1	thromboxane A synthase 1, platelet
6.15e-10	10861140	Tfec	transcription factor EC
6.18e-10	10738576	Grn	granulin
6.23e-10	10759287	Ep400	E1A binding protein p400
6.33e-10	10824530	Il6r	interleukin 6 receptor
6.34e-10	10738130	Rara	retinoic acid receptor, alpha
6.38e-10	10795679	Gpr137b	G protein-coupled receptor 137B
6.45e-10	10755088	Rtp4	receptor (chemosensory) transporter protein 4
6.45e-10	10888125	N/A
6.45e-10	10739541	N/A
6.48e-10	10786115	LOC100361866	eosinophil cationic protein-like
6.69e-10	10895140	Galnt4	polypeptide N-acetylgalactosaminyltransferase 4
6.74e-10	10856274	Cd8a	CD8a molecule
6.77e-10	10783371	N/A
6.84e-10	10725326	Thumpd1	THUMP domain containing 1
6.84e-10	10773754	Dusp18	dual specificity phosphatase 18
6.91e-10	10734975	Tp53	tumor protein p53
6.97e-10	10856232	Eif2ak3	eukaryotic translation initiation factor 2 alpha kinase 3
7.03e-10	10787197	Cyp4f18	cytochrome P450, family 4, subfamily f, polypeptide 18
7.05e-10	10812162	Erap1	endoplasmic reticulum aminopeptidase 1
7.14e-10	10858315	Il17ra	interleukin 17 receptor A
7.15e-10	10938654	Il2rg	interleukin 2 receptor, gamma
7.18e-10	10913592	Smarcc1	SWI/SNF related, matrix associated, actin dependent regulator of chromatin, subfamily c, member 1
7.19e-10	10799558	Phyh	phytanoyl-CoA 2-hydroxylase
7.29e-10	10865527	Tpi1	triosephosphate isomerase 1
7.31e-10	10892643	N/A
7.33e-10	10901115	LOC691422	similar to zinc finger protein 101; similar to zinc finger protein 101 [Source:RGD Symbol;Acc:1583951]
7.34e-10	10927612	Tbc1d8	TBC1 domain family, member 8
7.49e-10	10939018	Brwd3	bromodomain and WD repeat domain containing 3
7.57e-10	10819852	Erich3	glutamate-rich 3
7.59e-10	10787784	N/A
7.75e-10	10802995	Zfp516	zinc finger protein 516
7.82e-10	10899387	Nr4a1	nuclear receptor subfamily 4, group A, member 1
7.85e-10	10939570	Zdhhc9	zinc finger, DHHC-type containing 9
7.88e-10	10775283	Abcg3l1; Abcg3l3; Abcg3	ATP-binding cassette, subfamily G (WHITE), member 3-like 1; ATP-binding cassette, subfamily G (WHITE), member 3-like 3; ATP-binding cassette, subfamily G (WHITE), member 3
7.93e-10	10823057	Slc7a11	solute carrier family 7 (anionic amino acid transporter light chain, xc- system), member 11
7.96e-10	10849290	Gatm	glycine amidinotransferase (L-arginine:glycine amidinotransferase)
8.08e-10	10903400	Ubr5	ubiquitin protein ligase E3 component n-recognin 5
8.37e-10	10842704	Akr1b1-ps3	aldo-keto reductase family 1, member B1 (aldose reductase), pseudogene 3
8.54e-10	10717011	NEWGENE_2319083; LOC103690922	epithelial cell transforming 2 like; epithelial cell-transforming sequence 2 oncogene-like
8.67e-10	10763284	Zcchc2	zinc finger, CCHC domain containing 2
8.76e-10	10897465	Cyth4	cytohesin 4
8.84e-10	10781927	Slain1	SLAIN motif family, member 1
9.09e-10	10866012	Clec1a	C-type lectin domain family 1, member A
9.11e-10	10847562	Tspan18	tetraspanin 18
9.14e-10	10909321	Zfp202	zinc finger protein 202
9.15e-10	10847745	Ldlrad3	low density lipoprotein receptor class A domain containing 3
9.3e-10	10757808	Syna	syncytin a
9.35e-10	10902506	Cct2	chaperonin containing TCP1, subunit 2 (beta)
9.43e-10	10707455	Herc2	HECT and RLD domain containing E3 ubiquitin protein ligase 2
9.55e-10	10867799	Rmdn1	regulator of microtubule dynamics 1
9.55e-10	10818708	F3	coagulation factor III (thromboplastin, tissue factor)
9.55e-10	10843793	Notch1	notch 1
9.59e-10	10844916	Scai	suppressor of cancer cell invasion
9.6e-10	10780396	Psme1	proteasome (prosome, macropain) activator subunit 1
9.77e-10	10705485	Fbl; Dyrk1b	fibrillarin; dual-specificity tyrosine-(Y)-phosphorylation regulated kinase 1b
9.79e-10	10798021	RGD1563601	similar to Tpi1 protein
9.81e-10	10729913	Myof	myoferlin
9.86e-10	10812331	Faim	Fas apoptotic inhibitory molecule
9.86e-10	10912456	Faim	Fas apoptotic inhibitory molecule
1.01e-09	10767465	Il24	interleukin 24
1.03e-09	10714763	Uhrf2	ubiquitin-like with PHD and ring finger domains 2, E3 ubiquitin protein ligase
1.04e-09	10778708	B3gnt2	UDP-GlcNAc:betaGal beta-1,3-N-acetylglucosaminyltransferase 2
1.04e-09	10877130	Ptgr1	prostaglandin reductase 1
1.04e-09	10821250	Gapt	Grb2-binding adaptor protein, transmembrane
1.05e-09	10892509	N/A
1.05e-09	10831640	RT1-Ha	RT1 class II, locus Ha
1.06e-09	10923031	Mettl21cl1	methyltransferase like 21C-like 1
1.08e-09	10802274	Malt1	MALT1 paracaspase
1.1e-09	10840673	Cst7	cystatin F (leukocystatin)
1.11e-09	10781616	Epsti1	epithelial stromal interaction 1 (breast)
1.11e-09	10793002	Myo16	myosin XVI
1.11e-09	10798635	N/A
1.12e-09	10773973	Ankrd36	ankyrin repeat domain 36
1.14e-09	10821851	Il7r	interleukin 7 receptor
1.14e-09	10884868	Fancm	Fanconi anemia, complementation group M
1.15e-09	10804384	Fem1c	fem-1 homolog c (C. elegans)
1.15e-09	10856089	N/A
1.16e-09	10755186	Senp2	Sumo1/sentrin/SMT3 specific peptidase 2
1.16e-09	10895600	Mdm1	Mdm1 nuclear protein
1.17e-09	10851407	Chd6	chromodomain helicase DNA binding protein 6
1.17e-09	10779673	Lgals3	lectin, galactoside-binding, soluble, 3
1.18e-09	10748870	Cd300lf	Cd300 molecule-like family member F
1.18e-09	10733243	Hnrnph1	heterogeneous nuclear ribonucleoprotein H1
1.19e-09	10766521	Eprs	glutamyl-prolyl-tRNA synthetase
1.21e-09	10852799	Prkag2	protein kinase, AMP-activated, gamma 2 non-catalytic subunit
1.23e-09	10769547	Rcsd1	RCSD domain containing 1
1.24e-09	10830230	Smpdl3a	sphingomyelin phosphodiesterase, acid-like 3A
1.24e-09	10870987	Bend5	BEN domain containing 5
1.27e-09	10886345	N/A
1.27e-09	10871444	Slc6a9	solute carrier family 6 (neurotransmitter transporter, glycine), member 9
1.28e-09	10834109	Il1rn	interleukin 1 receptor antagonist
1.28e-09	10828026	Lst1	leukocyte specific transcript 1
1.29e-09	10771669	Sdad1	SDA1 domain containing 1
1.3e-09	10930259	Rab31	RAB31, member RAS oncogene family
1.3e-09	10784004	Mcpt10	mast cell protease 10
1.31e-09	10845647	Dpp4	dipeptidylpeptidase 4
1.32e-09	10783474	LOC290071; RGD1311300	similar to T cell receptor V-alpha J-alpha; similar to T cell receptor V delta 6
1.32e-09	10925267	Agap1	ArfGAP with GTPase domain, ankyrin repeat and PH domain 1
1.32e-09	10777492	Acox3	acyl-CoA oxidase 3, pristanoyl
1.33e-09	10940660	N/A
1.34e-09	10929321	Dock10	dedicator of cytokinesis 10
1.36e-09	10778763	Rel	v-rel avian reticuloendotheliosis viral oncogene homolog
1.37e-09	10925127	Dgkd	diacylglycerol kinase, delta
1.37e-09	10870733	Magoh	mago-nashi homolog, proliferation-associated (Drosophila)
1.44e-09	10927842	Stat1	signal transducer and activator of transcription 1
1.44e-09	10781733	Kbtbd6; Kbtbd7	kelch repeat and BTB (POZ) domain containing 6; kelch repeat and BTB (POZ) domain containing 7
1.45e-09	10840183	Plcb4	phospholipase C, beta 4
1.46e-09	10815763	Tiparp	TCDD-inducible poly(ADP-ribose) polymerase
1.51e-09	10828884	Pim1	Pim-1 proto-oncogene, serine/threonine kinase
1.51e-09	10731428	Gspt1	G1 to S phase transition 1
1.53e-09	10704956	Plaur	plasminogen activator, urokinase receptor
1.53e-09	10827609	Dstnl1	destrin-like 1
1.56e-09	10712657	Cpt1a	carnitine palmitoyltransferase 1a, liver
1.56e-09	10940659	N/A
1.57e-09	10754700	Lrch3	leucine-rich repeats and calponin homology (CH) domain containing 3
1.61e-09	10873203	Ece1	endothelin converting enzyme 1
1.62e-09	10850390	Snx5	sorting nexin 5
1.62e-09	10777571	Htt	huntingtin
1.62e-09	10762044	Pptc7	PTC7 protein phosphatase homolog
1.63e-09	10874655	Nadk	NAD kinase
1.67e-09	10702746	Scaf8	SR-related CTD-associated factor 8
1.68e-09	10910158	Fbxo22	F-box protein 22
1.68e-09	10871494	Ebna1bp2	EBNA1 binding protein 2
1.69e-09	10833005	Slc29a3	solute carrier family 29 (equilibrative nucleoside transporter), member 3
1.72e-09	10923700	Fam117b	family with sequence similarity 117, member B
1.72e-09	10921951	Cd2ap	CD2-associated protein
1.73e-09	10730519	Ldb1	LIM domain binding 1
1.74e-09	10710795	Il21r	interleukin 21 receptor
1.74e-09	10759846	Zfp958	zinc finger protein 958
1.78e-09	10828021	Tnf	tumor necrosis factor
1.8e-09	10936660	N/A
1.82e-09	10822099	Otulin	OTU deubiquitinase with linear linkage specificity
1.84e-09	10906608	Slc38a2	solute carrier family 38, member 2
1.85e-09	10766304	LOC690288; LOC103693691	similar to Dynein heavy chain at 16F CG7092-PA; dynein heavy chain 14, axonemal-like; similar to Dynein heavy chain at 16F CG7092-PA [Source:RGD Symbol;Acc:1582826]
1.87e-09	10801980	MGC105567	similar to cDNA sequence BC023105
1.88e-09	10825472	Atp1a1	ATPase, Na+/K+ transporting, alpha 1 polypeptide
1.88e-09	10763073	Ankle2	ankyrin repeat and LEM domain containing 2
1.91e-09	10707237	Prmt3	protein arginine methyltransferase 3
1.92e-09	10773198	Zfp518b	zinc finger protein 518B
1.95e-09	10738556	Tmub2	transmembrane and ubiquitin-like domain containing 2
1.98e-09	10827349	Ifi44	interferon-induced protein 44
1.99e-09	10809392	Mt1a	metallothionein 1a
2e-09	10749874	Gbe1	glucan (1,4-alpha-), branching enzyme 1
2.01e-09	10903246	Stk3	serine/threonine kinase 3
2.02e-09	10750144	Tiam1	T-cell lymphoma invasion and metastasis 1
2.02e-09	10728912	N/A
2.03e-09	10712841	Ptprcap	protein tyrosine phosphatase, receptor type, C-associated protein
2.06e-09	10832833	Jmjd1c	jumonji domain containing 1C
2.07e-09	10883357	Dnmt3a	DNA (cytosine-5-)-methyltransferase 3 alpha
2.08e-09	10747494	Stat5b	signal transducer and activator of transcription 5B
2.09e-09	10924667	LOC102551819	U3 small nucleolar RNA-associated protein 14 homolog B-like; U3 small nucleolar RNA-associated protein 14 homolog B-like [Source:RGD Symbol;Acc:7514331]
2.2e-09	10774375	Peli1	pellino E3 ubiquitin protein ligase 1
2.27e-09	10819512	Gbp4	guanylate binding protein 4
2.27e-09	10889263	Trib2	tribbles pseudokinase 2
2.3e-09	10919453	Pik3cb	phosphatidylinositol-4,5-bisphosphate 3-kinase, catalytic subunit beta
2.31e-09	10739988	Rnf213	ring finger protein 213
2.35e-09	10826335	Agl	amylo-alpha-1, 6-glucosidase, 4-alpha-glucanotransferase
2.37e-09	10912640	Topbp1	topoisomerase (DNA) II binding protein 1
2.38e-09	10793600	LOC102551451; LOC102550664; LOC103694018	zinc finger protein 665-like; zinc finger protein 85-like; zinc finger protein 120-like
2.39e-09	10832705	Ccdc6	coiled-coil domain containing 6
2.41e-09	10748061	Plekhm1	pleckstrin homology domain containing, family M (with RUN domain) member 1
2.41e-09	10797009	LOC103690340; LOC102551451; LOC102551150; LOC102549001; LOC102556047	zinc finger protein 431-like; zinc finger protein 665-like; zinc finger protein 845-like
2.41e-09	10789774	Pde12	phosphodiesterase 12
2.42e-09	10920745	Tgfbr2	transforming growth factor, beta receptor 2
2.43e-09	10785897	Uggt2	UDP-glucose glycoprotein glucosyltransferase 2; UDP-glucose glycoprotein glucosyltransferase 2 [Source:MGI Symbol;Acc:MGI:1913685]
2.44e-09	10827292	Dnase2b	deoxyribonuclease II beta
2.47e-09	10887774	Rapgef5	Rap guanine nucleotide exchange factor (GEF) 5
2.48e-09	10717168	RGD1559962	similar to High mobility group protein 2 (HMG-2)
2.49e-09	10862410	Gimap6	GTPase, IMAP family member 6
2.51e-09	10852437	Kcnq2	potassium channel, voltage-gated KQT-like subfamily Q, member 2
2.51e-09	10779832	Rnase4	ribonuclease, RNase A family 4
2.55e-09	10940663	N/A
2.55e-09	10787841	Msmo1	methylsterol monooxygenase 1
2.56e-09	10931692	LOC305806; LOC102550314	glutaredoxin (thioltransferase)-like; uncharacterized LOC102550314 [Source:RGD Symbol;Acc:7600849]
2.58e-09	10746547	Abi3	ABI family, member 3
2.58e-09	10892478	N/A
2.59e-09	10754088	Naa50	N(alpha)-acetyltransferase 50, NatE catalytic subunit
2.59e-09	10775484	Arhgap24	Rho GTPase activating protein 24
2.6e-09	10889607	Pik3cg	phosphatidylinositol-4,5-bisphosphate 3-kinase, catalytic subunit gamma
2.6e-09	10816834	Adar	adenosine deaminase, RNA-specific
2.61e-09	10707912	Fam169b	family with sequence similarity 169, member B
2.61e-09	10887622	Crip1	cysteine-rich protein 1 (intestinal)
2.62e-09	10725235	Syt17	synaptotagmin XVII
2.63e-09	10750505	Pcp4	Purkinje cell protein 4
2.69e-09	10773496	Tnip2	TNFAIP3 interacting protein 2
2.7e-09	10903459	Klf10	Kruppel-like factor 10
2.74e-09	10928668	Ikzf2	IKAROS family zinc finger 2
2.78e-09	10883858	Iah1	isoamyl acetate-hydrolyzing esterase 1 homolog
2.8e-09	10911593	Myo5a	myosin VA
2.8e-09	10839307	Mir147	microRNA 147
2.8e-09	10877069	Lpar1	lysophosphatidic acid receptor 1
2.86e-09	10932534	Plp2	proteolipid protein 2 (colonic epithelium-enriched)
2.9e-09	10876479	Rnf38	ring finger protein 38
2.91e-09	10921168	Vps26b	VPS26 retromer complex component B
2.91e-09	10779811	Apex1	APEX nuclease (multifunctional DNA repair enzyme) 1
2.95e-09	10799291	Klf6	Kruppel-like factor 6
2.96e-09	10906169	Plxnb2; Mir349	plexin B2; microRNA 349
2.97e-09	10783964	Ripk3	receptor-interacting serine-threonine kinase 3
3.02e-09	10736802	Slfn4	schlafen 4
3.06e-09	10916955	Cd3e	CD3 molecule, epsilon
3.07e-09	10887270	Traf3	Tnf receptor-associated factor 3
3.09e-09	10874298	Acot7	acyl-CoA thioesterase 7
3.11e-09	10813007	Il6st	interleukin 6 signal transducer
3.12e-09	10902003	Nudt4	nudix (nucleoside diphosphate linked moiety X)-type motif 4
3.12e-09	10767268	Tmem163	transmembrane protein 163
3.15e-09	10796347	Mcm10	minichromosome maintenance 10 replication initiation factor
3.16e-09	10765248	Slc19a2	solute carrier family 19 (thiamine transporter), member 2
3.16e-09	10894221	Zfp472	zinc finger protein 472
3.17e-09	10832478	Vpreb3	pre-B lymphocyte 3
3.2e-09	10797019	LOC102549001; LOC102556047	zinc finger protein 845-like
3.2e-09	10754785	Tfrc	transferrin receptor
3.24e-09	10931168	LOC305806; LOC102550314	glutaredoxin (thioltransferase)-like; uncharacterized LOC102550314 [Source:RGD Symbol;Acc:7600849]
3.34e-09	10833588	Marcks	myristoylated alanine rich protein kinase C substrate
3.41e-09	10790096	Nisch	nischarin
3.47e-09	10759248	Ulk1	unc-51 like autophagy activating kinase 1
3.48e-09	10796858	Nsun2	NOP2/Sun RNA methyltransferase family, member 2
3.51e-09	10791579	Aga	aspartylglucosaminidase
3.62e-09	10822864	Bbs7	Bardet-Biedl syndrome 7
3.65e-09	10894942	Usp44	ubiquitin specific peptidase 44
3.66e-09	10755094	St6gal1	ST6 beta-galactosamide alpha-2,6-sialyltranferase 1
3.73e-09	10891910	Ifi27l2b	interferon, alpha-inducible protein 27 like 2B
3.74e-09	10866788	C2cd5	C2 calcium-dependent domain containing 5
3.76e-09	10876295	Cd72	Cd72 molecule
3.84e-09	10742145	Ccng1	cyclin G1
3.85e-09	10733531	Kif3a	kinesin family member 3a
3.91e-09	10744283	Acap1	ArfGAP with coiled-coil, ankyrin repeat and PH domains 1
3.92e-09	10831957	Srpk1	SRSF protein kinase 1
3.92e-09	10824115	Cd1d1	CD1d1 molecule
3.94e-09	10717170	Epb41l2	erythrocyte membrane protein band 4.1-like 2
3.95e-09	10875503	RGD1559904	similar to mKIAA1429 protein
4.04e-09	10796418	Olah	oleoyl-ACP hydrolase
4.07e-09	10780564	Mcpt9	mast cell protease 9
4.12e-09	10783203	Rnase2	ribonuclease, RNase A family, 2 (liver, eosinophil-derived neurotoxin)
4.14e-09	10844331	Lcn2	lipocalin 2
4.18e-09	10825686	Capza1	capping protein (actin filament) muscle Z-line, alpha 1
4.2e-09	10935739	Aff2	AF4/FMR2 family, member 2
4.22e-09	10724389	LOC102554102	tripartite motif-containing protein 30A-like
4.25e-09	10727405	Aldh3b1	aldehyde dehydrogenase 3 family, member B1
4.26e-09	10722131	Saa4; Hps5	serum amyloid A4, constitutive; Hermansky-Pudlak syndrome 5
4.31e-09	10936248	Atp1b4	ATPase, (Na+)/K+ transporting, beta 4 polypeptide
4.34e-09	10808223	Bco1	beta-carotene oxygenase 1
4.48e-09	10852115	Uchl3; Uchl3-ps1	ubiquitin carboxyl-terminal esterase L3 (ubiquitin thiolesterase); ubiquitin carboxyl-terminal esterase L3, pseudogene 1
4.49e-09	10872665	Themis2	thymocyte selection associated family member 2
4.51e-09	10797189	Ddx46	DEAD (Asp-Glu-Ala-Asp) box polypeptide 46
4.59e-09	10937499	LOC685025	hypothetical protein LOC685025
4.67e-09	10901842	Nedd1	neural precursor cell expressed, developmentally down-regulated 1
4.68e-09	10940550	N/A
4.71e-09	10898862	Irak4	interleukin-1 receptor-associated kinase 4
4.72e-09	10731514	Dexi	dexamethasone-induced transcript
4.77e-09	10785263	Lrch1	leucine-rich repeats and calponin homology (CH) domain containing 1
4.83e-09	10921274	Satb1	SATB homeobox 1
4.91e-09	10853471	Cyp51	cytochrome P450, family 51
4.92e-09	10759488	Zfp958	zinc finger protein 958
4.95e-09	10797631	Nol8	nucleolar protein 8
4.99e-09	10749172	Acox1	acyl-CoA oxidase 1, palmitoyl
5.08e-09	10862586	Hibadh	3-hydroxyisobutyrate dehydrogenase
5.1e-09	10913311	Slc26a6	solute carrier family 26 (anion exchanger), member 6
5.13e-09	10771426	Sec31a	SEC31 homolog A, COPII coat complex component
5.16e-09	10860951	Asns	asparagine synthetase (glutamine-hydrolyzing)
5.16e-09	10875375	Car8	carbonic anhydrase 8
5.22e-09	10915555	S1pr5	sphingosine-1-phosphate receptor 5
5.23e-09	10887306	Tnfaip2	tumor necrosis factor, alpha-induced protein 2
5.24e-09	10791358	Ddx60	DEAD (Asp-Glu-Ala-Asp) box polypeptide 60
5.36e-09	10755148	Fetub	fetuin B
5.57e-09	10932795	Acsl4	acyl-CoA synthetase long-chain family member 4
5.63e-09	10791233	Atp6v1b2	ATPase, H transporting, lysosomal V1 subunit B2
5.82e-09	10718504	Lilrc2	leukocyte immunoglobulin-like receptor, subfamily C, member 2
5.88e-09	10781838	Uchl3; Uchl3-ps1	ubiquitin carboxyl-terminal esterase L3 (ubiquitin thiolesterase); ubiquitin carboxyl-terminal esterase L3, pseudogene 1
5.89e-09	10702897	Sytl3	synaptotagmin-like 3
5.91e-09	10771475	Hnrnpd	heterogeneous nuclear ribonucleoprotein D
5.94e-09	10825696	Wnt2b	wingless-type MMTV integration site family, member 2B
5.95e-09	10779546	LOC305806; LOC102550314	glutaredoxin (thioltransferase)-like; uncharacterized LOC102550314 [Source:RGD Symbol;Acc:7600849]
6.09e-09	10762115	Naa25	N(alpha)-acetyltransferase 25, NatB auxiliary subunit
6.13e-09	10862473	Osbpl3	oxysterol binding protein-like 3
6.18e-09	10744995	Fam101b	family with sequence similarity 101, member B
6.24e-09	10890967	Cox16; Synj2bp	cytochrome c oxidase assembly protein 16; synaptojanin 2 binding protein
6.29e-09	10920056	Mapkapk3	mitogen-activated protein kinase-activated protein kinase 3
6.36e-09	10736330	N/A
6.44e-09	10811663	Galns	galactosamine (N-acetyl)-6-sulfatase
6.49e-09	10816470	Mef2d	myocyte enhancer factor 2D
6.56e-09	10855393	Gimap7	GTPase, IMAP family member 7
6.57e-09	10745931	Mir21; Vmp1	microRNA 21; vacuole membrane protein 1
6.79e-09	10824680	Snapin	SNAP-associated protein
6.79e-09	10724073	Art2b	ADP-ribosyltransferase 2b
6.83e-09	10913186	Impdh2	IMP (inosine 5-monophosphate) dehydrogenase 2
7e-09	10710154	Xylt1	xylosyltransferase 1
7.11e-09	10837170	N/A
7.12e-09	10806829	Pkn1	protein kinase N1
7.2e-09	10733001	Fam71b	family with sequence similarity 71, member B
7.22e-09	10728936	Ms4a4c	membrane-spanning 4-domains, subfamily A, member 4C
7.29e-09	10772194	Hopx	HOP homeobox
7.38e-09	10838192	Lmo2	LIM domain only 2
7.4e-09	10905439	Csnk1e	casein kinase 1, epsilon
7.5e-09	10729715	Sgms1	sphingomyelin synthase 1
7.5e-09	10742483	Hnrnpab	heterogeneous nuclear ribonucleoprotein A/B
7.55e-09	10780088	N/A
7.59e-09	10707418	Cyfip1	cytoplasmic FMR1 interacting protein 1
7.71e-09	10714136	Lpxn	leupaxin
7.71e-09	10718001	Agpat4	1-acylglycerol-3-phosphate O-acyltransferase 4
8.03e-09	10815425	Alg5	ALG5, dolichyl-phosphate beta-glucosyltransferase
8.03e-09	10803377	Dsc1	desmocollin 1
8.07e-09	10830561	Sesn1	sestrin 1
8.11e-09	10833394	Man1a1	mannosidase, alpha, class 1A, member 1
8.14e-09	10770795	Hsd11b1	hydroxysteroid 11-beta dehydrogenase 1
8.15e-09	10724987	Pth	parathyroid hormone
8.18e-09	10860815	Samd9l; LOC103690031; LOC102553788; LOC684193	sterile alpha motif domain containing 9-like; sterile alpha motif domain-containing protein 9-like; sterile alpha motif domain containing 9-like [Source:MGI Symbol;Acc:MGI:1343184]; uncharacterized LOC102553788; similar to sterile alpha motif domain containing 9-like
8.18e-09	10937805	Rbbp7	retinoblastoma binding protein 7
8.27e-09	10885560	Arg2	arginase 2
8.36e-09	10940641	N/A
8.4e-09	10724052	Atg16l2	autophagy related 16-like 2
8.43e-09	10735827	Tsr1	TSR1, 20S rRNA accumulation, homolog (S. cerevisiae)
8.45e-09	10787889	Ddx60	DEAD (Asp-Glu-Ala-Asp) box polypeptide 60
8.47e-09	10804511	Zfp608	zinc finger protein 608
8.57e-09	10855377	Gimap8	GTPase, IMAP family member 8
8.59e-09	10857667	Thumpd3	THUMP domain containing 3
8.61e-09	10868289	Dnaja1	DnaJ (Hsp40) homolog, subfamily A, member 1
8.63e-09	10742352	RGD1559575	similar to novel protein
8.68e-09	10767132	Ptpn4	protein tyrosine phosphatase, non-receptor type 4
8.8e-09	10912161	Ctsh	cathepsin H
8.8e-09	10800969	Cxxc5	CXXC finger protein 5
8.85e-09	10808393	RGD1304884	similar to RIKEN cDNA 6430548M08
8.86e-09	10914618	Ccr5	chemokine (C-C motif) receptor 5
8.96e-09	10740000	Rnf213	ring finger protein 213
8.99e-09	10818108	Rhoc	ras homolog family member C
9.12e-09	10734882	Per1	period circadian clock 1
9.13e-09	10706381	Ctu1	cytosolic thiouridylase subunit 1
9.14e-09	10801386	Tcerg1	transcription elongation regulator 1
9.37e-09	10879817	Ago1	argonaute RISC catalytic component 1
9.42e-09	10918392	Tpm1	tropomyosin 1, alpha
9.58e-09	10815308	Mgst2	microsomal glutathione S-transferase 2
9.62e-09	10802434	Psmg2	proteasome (prosome, macropain) assembly chaperone 2
9.74e-09	10728960	Stx3	syntaxin 3
9.75e-09	10838170	Abtb2	ankyrin repeat and BTB (POZ) domain containing 2
9.79e-09	10742254	Cyfip2	cytoplasmic FMR1 interacting protein 2
9.94e-09	10807583	Cirh1a	cirrhosis, autosomal recessive 1A (cirhin)
1e-08	10738237	Atp6v0a1	ATPase, H+ transporting, lysosomal V0 subunit A1
1e-08	10734475	Tmem220	transmembrane protein 220
1.01e-08	10733067	Zfp62	zinc finger protein 62
1.01e-08	10871182	Faah	fatty acid amide hydrolase
1.02e-08	10783253	Supt16h	SPT16 homolog, facilitates chromatin remodeling subunit
1.02e-08	10759616	Stxbp2	syntaxin binding protein 2
1.02e-08	10940600	N/A
1.04e-08	10795927	Idi2	isopentenyl-diphosphate delta isomerase 2
1.04e-08	10794353	Card19	caspase recruitment domain family, member 19
1.05e-08	10702880	Tmem181	transmembrane protein 181
1.05e-08	10864550	N/A
1.05e-08	10908082	N/A
1.06e-08	10746051	Zfp146	zinc finger protein 146
1.08e-08	10911287	Anxa2	annexin A2
1.08e-08	10915071	Cep295	centrosomal protein 295
1.09e-08	10748969	Sumo2	small ubiquitin-like modifier 2
1.1e-08	10812407	N/A
1.1e-08	10901621	Utp20	UTP20 small subunit (SSU) processome component
1.1e-08	10742617	Rad50	RAD50 homolog, double strand break repair protein
1.11e-08	10916432	Gramd1b	GRAM domain containing 1B
1.16e-08	10784117	Gjb2	gap junction protein, beta 2
1.16e-08	10866374	Lrp6	low density lipoprotein receptor-related protein 6
1.18e-08	10825665	Mov10	Mov10 RISC complex RNA helicase
1.18e-08	10782271	Plau	plasminogen activator, urokinase
1.18e-08	10747228	Krt35	keratin 35, type I
1.19e-08	10779028	N/A
1.2e-08	10739998	Rnf213	ring finger protein 213
1.2e-08	10759769	Pds5b	PDS5 cohesin associated factor B
1.21e-08	10798142	Serpinb6b	serine (or cysteine) peptidase inhibitor, clade B, member 6b
1.22e-08	10937867	N/A
1.22e-08	10754367	Stfa3	stefin A3
1.23e-08	10871133	Mknk1	MAP kinase-interacting serine/threonine kinase 1
1.23e-08	10845407	Cytip	cytohesin 1 interacting protein
1.27e-08	10902630	Cand1	cullin-associated and neddylation-dissociated 1
1.27e-08	10861736	Akr1b1	aldo-keto reductase family 1, member B1 (aldose reductase)
1.28e-08	10749307	Rhbdf2	rhomboid 5 homolog 2 (Drosophila)
1.28e-08	10796411	Mt1a	metallothionein 1a
1.29e-08	10901904	Elk3	ELK3, member of ETS oncogene family
1.29e-08	10866835	Casc1	cancer susceptibility candidate 1
1.29e-08	10841774	Slc32a1	solute carrier family 32 (GABA vesicular transporter), member 1
1.31e-08	10842384	Cse1l	CSE1 chromosome segregation 1-like (yeast)
1.31e-08	10825962	Gnai3	guanine nucleotide binding protein (G protein), alpha inhibiting activity polypeptide 3
1.32e-08	10715475	Bloc1s2	biogenesis of lysosomal organelles complex-1, subunit 2
1.34e-08	10913995	Dync1li1	dynein cytoplasmic 1 light intermediate chain 1
1.36e-08	10796965	Ercc6l2	excision repair cross-complementation group 6-like 2
1.37e-08	10705364	Sertad1	SERTA domain containing 1
1.38e-08	10847957	Prrg4	proline rich Gla (G-carboxyglutamic acid) 4 (transmembrane)
1.38e-08	10728924	Ms4a6bl; Ms4a6b	membrane-spanning 4-domains, subfamily A, member 6B-like; membrane-spanning 4-domains, subfamily A, member 6B
1.39e-08	10892007	Dicer1	dicer 1, ribonuclease type III
1.4e-08	10740018	Rnf213	ring finger protein 213
1.41e-08	10788569	Rbpms	RNA binding protein with multiple splicing
1.42e-08	10815176	Jade1	jade family PHD finger 1
1.44e-08	10917692	Tspan3	tetraspanin 3
1.44e-08	10712517	Cd81	Cd81 molecule
1.46e-08	10715483	Cwf19l1	CWF19-like 1, cell cycle control (S. pombe)
1.46e-08	10813778	Drosha	drosha, ribonuclease type III
1.47e-08	10710868	Apobr	apolipoprotein B receptor
1.48e-08	10925468	Gpr35	G protein-coupled receptor 35
1.48e-08	10936482	Timp1	TIMP metallopeptidase inhibitor 1
1.5e-08	10939260	Xkrx	XK, Kell blood group complex subunit-related, X-linked
1.5e-08	10813984	N/A
1.52e-08	10939837	Mmgt1	membrane magnesium transporter 1
1.56e-08	10839197	Casc4	cancer susceptibility candidate 4
1.57e-08	10929556	RGD1563917	similar to Nuclear autoantigen Sp-100 (Speckled 100 kDa)
1.61e-08	10785286	Lrrc63	leucine rich repeat containing 63
1.61e-08	10899913	Dgka	diacylglycerol kinase, alpha
1.61e-08	10717303	Vnn3	vanin 3
1.62e-08	10739992	Rnf213	ring finger protein 213
1.64e-08	10940444	N/A
1.65e-08	10913835	Lrrfip2	leucine rich repeat (in FLII) interacting protein 2
1.66e-08	10703706	N/A
1.67e-08	10903466	Azin1	antizyme inhibitor 1
1.67e-08	10940624	N/A
1.71e-08	10852034	Zfp64; Zfp93	zinc finger protein 64; zinc finger protein 93
1.76e-08	10779794	Parp2	poly (ADP-ribose) polymerase 2
1.76e-08	10902584	Nup107	nucleoporin 107
1.81e-08	10879726	Zc3h12a	zinc finger CCCH type containing 12A
1.81e-08	10888153	Thada	thyroid adenoma associated
1.82e-08	10862361	Pdia4	protein disulfide isomerase family A, member 4
1.83e-08	10923951	Pikfyve	phosphoinositide kinase, FYVE finger containing
1.84e-08	10779240	N/A
1.86e-08	10724580	LOC499229	similar to very large inducible GTPase 1 isoform A
1.9e-08	10837266	Zc3h15	zinc finger CCCH-type containing 15
1.92e-08	10759018	Mlec	malectin
1.93e-08	10828638	Anks1a	ankyrin repeat and sterile alpha motif domain containing 1A
1.94e-08	10780716	Mphosph8	M-phase phosphoprotein 8
1.94e-08	10853710	Glcci1	glucocorticoid induced 1
1.96e-08	10854558	Trim24	tripartite motif-containing 24
1.97e-08	10858370	Usp18	ubiquitin specific peptidase 18
1.98e-08	10908393	Ilf3	interleukin enhancer binding factor 3
1.99e-08	10780505	Ltb4r	leukotriene B4 receptor
2.04e-08	10885251	Hif1a	hypoxia-inducible factor 1, alpha subunit (basic helix-loop-helix transcription factor)
2.05e-08	10716480	Grk5	G protein-coupled receptor kinase 5
2.05e-08	10726860	Chid1	chitinase domain containing 1
2.07e-08	10732652	Dusp1	dual specificity phosphatase 1
2.09e-08	10930076	Dtymk	deoxythymidylate kinase
2.09e-08	10887638	N/A
2.1e-08	10837688	Fnbp4	formin binding protein 4
2.12e-08	10866544	Eps8	epidermal growth factor receptor pathway substrate 8
2.15e-08	10750117	Scaf4	SR-related CTD-associated factor 4
2.15e-08	10840519	Xrn2	5-3 exoribonuclease 2
2.16e-08	10731493	Litaf	lipopolysaccharide-induced TNF factor
2.19e-08	10713974	Slc15a3	solute carrier family 15 (oligopeptide transporter), member 3
2.19e-08	10844520	Mvb12b	multivesicular body subunit 12B
2.23e-08	10781441	Lpar6	lysophosphatidic acid receptor 6
2.24e-08	10712299	Taldo1	transaldolase 1
2.25e-08	10812526	Lhfpl2	lipoma HMGIC fusion partner-like 2
2.26e-08	10882752	Rhoq	ras homolog family member Q
2.26e-08	10808431	Irf8	interferon regulatory factor 8
2.27e-08	10834908	Setx	senataxin
2.27e-08	10754214	Lrrc58	leucine rich repeat containing 58
2.32e-08	10902080	Tmtc2	transmembrane and tetratricopeptide repeat containing 2
2.33e-08	10730312	Pi4k2a	phosphatidylinositol 4-kinase type 2 alpha
2.35e-08	10927875	Stat4	signal transducer and activator of transcription 4
2.36e-08	10840347	Dstn	destrin; destrin [Source:RGD Symbol;Acc:1588366]
2.37e-08	10890991	Map3k9	mitogen-activated protein kinase kinase kinase 9
2.37e-08	10705104	Cic	capicua transcriptional repressor
2.38e-08	10907062	Lmbr1l	limb development membrane protein 1-like
2.43e-08	10720891	Hpn	hepsin
2.43e-08	10842409	Ddx27	DEAD (Asp-Glu-Ala-Asp) box polypeptide 27
2.43e-08	10891436	Gtf2a1	general transcription factor IIA, 1
2.43e-08	10940549	N/A
2.46e-08	10841348	Acss2	acyl-CoA synthetase short-chain family member 2
2.52e-08	10853193	Rsbn1l	round spermatid basic protein 1-like
2.52e-08	10880074	Tinagl1	tubulointerstitial nephritis antigen-like 1
2.56e-08	10913664	Ngp	neutrophilic granule protein
2.56e-08	10819413	Adh5; Adh4	alcohol dehydrogenase 5 (class III), chi polypeptide; alcohol dehydrogenase 4 (class II), pi polypeptide
2.58e-08	10751136	Sidt1	SID1 transmembrane family, member 1
2.62e-08	10717813	Cnksr3	Cnksr family member 3
2.63e-08	10860765	Cdk6	cyclin-dependent kinase 6
2.65e-08	10802867	Pstpip2	proline-serine-threonine phosphatase-interacting protein 2
2.66e-08	10784140	Xpo4	exportin 4
2.66e-08	10859438	Plekha5	pleckstrin homology domain containing, family A member 5
2.68e-08	10754337	Iqcb1	IQ motif containing B1
2.69e-08	10749648	Mafg	v-maf avian musculoaponeurotic fibrosarcoma oncogene homolog G
2.7e-08	10709844	Wee1	WEE1 G2 checkpoint kinase
2.71e-08	10788204	Snx25	sorting nexin 25
2.72e-08	10796094	Fam208b	family with sequence similarity 208, member B
2.74e-08	10808652	Zfp276	zinc finger protein (C2H2 type) 276
2.76e-08	10780029	LOC103690667; RGD1563780	T-cell receptor alpha chain V region 2B4-like; similar to RIKEN cDNA A430107P09 gene [Source:RGD Symbol;Acc:1563780]
2.78e-08	10922476	Plekhb2	pleckstrin homology domain containing, family B (evectins) member 2
2.78e-08	10921290	Tbc1d5	TBC1 domain family, member 5
2.79e-08	10723156	Iqgap1	IQ motif containing GTPase activating protein 1
2.79e-08	10861986	LOC100909424; LOC688922	uncharacterized LOC100909424; similar to Insulin-induced gene 1 protein (INSIG-1) (Insulin-induced growth response protein CL-6) (Immediate-early protein CL-6) [Source:RGD Symbol;Acc:1582985]
2.83e-08	10734740	Pik3r6	phosphoinositide-3-kinase, regulatory subunit 6
2.86e-08	10752222	Lamp3	lysosomal-associated membrane protein 3
2.89e-08	10821072	Mast4	microtubule associated serine/threonine kinase family member 4
2.89e-08	10742744	Ccdc69	coiled-coil domain containing 69
2.89e-08	10807722	Txnl4b	thioredoxin-like 4B
2.92e-08	10917301	Sik2	salt-inducible kinase 2
2.93e-08	10747426	Dhx58	DEXH (Asp-Glu-X-His) box polypeptide 58
2.94e-08	10831620	RT1-DMb	RT1 class II, locus DMb
2.95e-08	10866041	Klrk1	killer cell lectin-like receptor subfamily K, member 1
3e-08	10880204	Epb4.1	erythrocyte membrane protein band 4.1
3e-08	10801541	Eif1a	eukaryotic translation initiation factor 1A
3.03e-08	10712935	Ctsf	cathepsin F
3.04e-08	10761526	Aacs	acetoacetyl-CoA synthetase
3.04e-08	10824780	N/A
3.04e-08	10731168	Eif3a	eukaryotic translation initiation factor 3, subunit A
3.06e-08	10719692	Cd177	CD177 molecule
3.07e-08	10775278	Lrrc8b	leucine rich repeat containing 8 family, member B
3.07e-08	10937932	Map3k15	mitogen-activated protein kinase kinase kinase 15
3.08e-08	10706117	Pepd	peptidase D
3.08e-08	10903896	Fbxo32	F-box protein 32
3.12e-08	10876831	Zfp462	zinc finger protein 462
3.14e-08	10794944	Cdkal1	CDK5 regulatory subunit associated protein 1-like 1
3.14e-08	10777290	Cpeb2	cytoplasmic polyadenylation element binding protein 2
3.16e-08	10918535	Fam63b	family with sequence similarity 63, member B
3.16e-08	10821050	Pik3r1	phosphoinositide-3-kinase, regulatory subunit 1 (alpha)
3.18e-08	10780077	LOC100360220	rCG20053-like [Source:RGD Symbol;Acc:2322530]
3.19e-08	10913487	Shisa5	shisa family member 5
3.19e-08	10865369	C3ar1	complement component 3a receptor 1
3.2e-08	10757898	Ncf1	neutrophil cytosolic factor 1
3.24e-08	10880805	Alpl	alkaline phosphatase, liver/bone/kidney
3.25e-08	10770351	Nvl	nuclear VCP-like
3.26e-08	10753135	Tmem50b	transmembrane protein 50B
3.29e-08	10940539	N/A
3.33e-08	10725397	Igsf6	immunoglobulin superfamily, member 6
3.34e-08	10862014	Parp12	poly (ADP-ribose) polymerase family, member 12
3.39e-08	10797127	Smad5	SMAD family member 5
3.43e-08	10913469	Pfkfb4	6-phosphofructo-2-kinase/fructose-2,6-biphosphatase 4
3.46e-08	10758599	Tctn1	tectonic family member 1
3.46e-08	10929842	Per2	period circadian clock 2
3.47e-08	10746095	Rps6kb1	ribosomal protein S6 kinase, polypeptide 1
3.47e-08	10794345	Susd3	sushi domain containing 3
3.48e-08	10886509	Unc79	unc-79 homolog (C. elegans)
3.5e-08	10836212	RGD1560248	similar to formin-like 2 isoform B
3.5e-08	10875988	Ddx58	DEAD (Asp-Glu-Ala-Asp) box polypeptide 58
3.51e-08	10851925	Znfx1	zinc finger, NFX1-type containing 1
3.51e-08	10871616	Hivep3	human immunodeficiency virus type I enhancer binding protein 3
3.54e-08	10772915	Sel1l3	sel-1 suppressor of lin-12-like 3 (C. elegans)
3.55e-08	10865956	Clec2d2	C-type lectin domain family 2 member D2
3.56e-08	10745266	Tmem97	transmembrane protein 97
3.57e-08	10703710	Lilrb1; Lilra3	leukocyte immunoglobulin-like receptor, subfamily B (with TM and ITIM domains), member 1; leukocyte immunoglobulin-like receptor, subfamily A (without TM domain), member 3
3.58e-08	10868165	Srsf12	serine/arginine-rich splicing factor 12
3.59e-08	10809303	Nlrc5	NLR family, CARD domain containing 5
3.59e-08	10908391	Slc44a2	solute carrier family 44 (choline transporter), member 2
3.6e-08	10717106	Themis	thymocyte selection associated
3.61e-08	10815815	Gfm1	G elongation factor, mitochondrial 1
3.63e-08	10882812	Msh2	mutS homolog 2
3.67e-08	10872101	Sfpq	splicing factor proline/glutamine-rich
3.7e-08	10924199	Smarcal1	Swi/SNF related matrix associated, actin dependent regulator of chromatin, subfamily a-like 1
3.72e-08	10810727	Psmb10	proteasome subunit beta 10
3.72e-08	10891818	Atxn3	ataxin 3
3.74e-08	10923127	N/A
3.75e-08	10894857	Cdk17	cyclin-dependent kinase 17
3.76e-08	10862415	Tmem176b	transmembrane protein 176B
3.81e-08	10829831	Slc25a16	solute carrier family 25 (mitochondrial carrier), member 16
3.83e-08	10721682	N/A
3.84e-08	10821117	Nln	neurolysin (metallopeptidase M3 family)
3.87e-08	10914614	Ccr5; Ccr2	chemokine (C-C motif) receptor 5; chemokine (C-C motif) receptor 2
3.87e-08	10778204	N/A
3.88e-08	10915437	Dnmt1	DNA (cytosine-5-)-methyltransferase 1
3.89e-08	10886298	Zc3h14	zinc finger CCCH type containing 14
3.9e-08	10842964	Ppdpf	pancreatic progenitor cell differentiation and proliferation factor
3.91e-08	10867479	N/A
3.91e-08	10823570	Ift80	intraflagellar transport 80
3.93e-08	10737770	Mir152	microRNA 152
3.95e-08	10862285	Olr803	olfactory receptor 803
3.95e-08	10786028	Gpr183	G protein-coupled receptor 183
3.95e-08	10771883	Igj	immunoglobulin joining chain
3.97e-08	10874152	Eno1	enolase 1, (alpha)
3.98e-08	10906643	Amigo2	adhesion molecule with Ig like domain 2
3.98e-08	10924918	Ptma	prothymosin alpha
4.02e-08	10930717	Emr4	EGF-like module containing, mucin-like, hormone receptor-like sequence 4
4.03e-08	10702936	Wtap	Wilms tumor 1 associated protein
4.08e-08	10833198	Ddx21	DEAD (Asp-Glu-Ala-Asp) box helicase 21
4.08e-08	10754939	Fam43a	family with sequence similarity 43, member A
4.08e-08	10790734	Zfp709	zinc finger protein 709
4.19e-08	10922843	N/A
4.19e-08	10865463	Ptpn6	protein tyrosine phosphatase, non-receptor type 6
4.22e-08	10796220	Gata3	GATA binding protein 3
4.25e-08	10796234	Celf2	CUGBP, Elav-like family member 2
4.26e-08	10827299	LOC56764	dnaj-like protein
4.27e-08	10874708	Ccnl2	cyclin L2
4.27e-08	10902885	Tspan31	tetraspanin 31
4.31e-08	10721249	LOC690483	hypothetical protein LOC690483
4.35e-08	10742288	Itk	IL2-inducible T-cell kinase
4.4e-08	10782870	Ddhd1	DDHD domain containing 1
4.45e-08	10830102	N/A
4.47e-08	10704536	Prkd2	protein kinase D2
4.51e-08	10728616	Best1	bestrophin 1
4.51e-08	10861560	N5	DNA binding protein N5
4.52e-08	10887667	LOC102546716	nuclear ubiquitous casein and cyclin-dependent kinase substrate 1-like
4.52e-08	10859581	Cmas	cytidine monophosphate N-acetylneuraminic acid synthetase
4.55e-08	10721616	Prr12	proline rich 12
4.59e-08	10882571	Mta3	metastasis associated 1 family, member 3
4.6e-08	10834945	Rapgef1	Rap guanine nucleotide exchange factor (GEF) 1
4.6e-08	10798390	Fam65b	family with sequence similarity 65, member B
4.61e-08	10769887	Ptma	prothymosin alpha
4.63e-08	10786465	Tkt	transketolase
4.7e-08	10741112	Traf7; Rab26	TNF receptor-associated factor 7, E3 ubiquitin protein ligase; RAB26, member RAS oncogene family
4.73e-08	10860773	N/A
4.74e-08	10853797	Tes	testin LIM domain protein
4.77e-08	10876466	Gne	glucosamine (UDP-N-acetyl)-2-epimerase/N-acetylmannosamine kinase
4.79e-08	10801975	MGC108823; LOC102549198; LOC100910979	similar to interferon-inducible GTPase; interferon-inducible GTPase 1-like
4.82e-08	10740688	Dnaja3	DnaJ (Hsp40) homolog, subfamily A, member 3
4.92e-08	10744918	Rpa1	replication protein A1
4.94e-08	10708745	Gab2	GRB2-associated binding protein 2
4.95e-08	10828364	Brd2	bromodomain containing 2
4.97e-08	10739990	Rnf213	ring finger protein 213
4.98e-08	10807300	Ctcf	CCCTC-binding factor (zinc finger protein)
4.99e-08	10727924	Sipa1	signal-induced proliferation-associated 1
5.05e-08	10881178	Dnajc16	DnaJ (Hsp40) homolog, subfamily C, member 16
5.12e-08	10801381	N/A
5.16e-08	10940471	N/A
5.16e-08	10716562	N/A
5.22e-08	10762600	Gcn1l1	GCN1 eIF2 alpha kinase activator-like 1
5.25e-08	10855387	Gimap4	GTPase, IMAP family member 4
5.31e-08	10805066	Ldlrad4	low density lipoprotein receptor class A domain containing 4
5.36e-08	10721126	Dpy19l3	dpy-19-like 3 (C. elegans)
5.36e-08	10746286	Luc7l3	LUC7-like 3 pre-mRNA splicing factor
5.45e-08	10911524	Rab27a	RAB27A, member RAS oncogene family
5.46e-08	10769771	Fcgr2b	Fc fragment of IgG, low affinity IIb, receptor
5.47e-08	10895499	Tspan8	tetraspanin 8
5.47e-08	10780026	N/A
5.57e-08	10849488	Atp8b4	ATPase, class I, type 8B, member 4
5.59e-08	10894643	LOC362863	first gene upstream of Nt5dc3
5.61e-08	10809524	Lpcat2	lysophosphatidylcholine acyltransferase 2
5.63e-08	10767189	Ddx18	DEAD (Asp-Glu-Ala-Asp) box polypeptide 18
5.63e-08	10786359	Fam208a	family with sequence similarity 208, member A
5.7e-08	10776968	LOC685935	similar to splicing factor, arginine/serine-rich 10 (transformer 2 homolog, Drosophila)
5.73e-08	10831135	Ddx39b	DEAD (Asp-Glu-Ala-Asp) box polypeptide 39B
5.77e-08	10821900	Dnajc21	DnaJ (Hsp40) homolog, subfamily C, member 21
5.77e-08	10932740	N/A
5.79e-08	10750996	Cd96; Plcxd2; Phldb2	CD96 molecule; phosphatidylinositol-specific phospholipase C, X domain containing 2; pleckstrin homology-like domain, family B, member 2
5.83e-08	10860801	RGD1563091	similar to OEF2
5.84e-08	10936537	LOC299312; Gtpbp4	similar to G protein-binding protein CRFG; GTP binding protein 4
5.87e-08	10783439	RGD1563780	similar to RIKEN cDNA A430107P09 gene [Source:RGD Symbol;Acc:1563780]
5.93e-08	10863213	N/A
5.96e-08	10703443	Fpr2; Fpr2l	formyl peptide receptor 2; formyl peptide receptor 2-like
5.97e-08	10750825	Nxpe3	neurexophilin and PC-esterase domain family, member 3
5.97e-08	10772066	Gnrhr	gonadotropin releasing hormone receptor
5.98e-08	10738676	Fmnl1	formin-like 1
5.99e-08	10900651	Abca7	ATP-binding cassette, subfamily A (ABC1), member 7
6e-08	10800216	RGD1311805	similar to RIKEN cDNA 2400010D15
6.03e-08	10807311	Rltpr	RGD motif, leucine rich repeats, tropomodulin domain and proline-rich containing
6.04e-08	10918031	Kif23	kinesin family member 23
6.07e-08	10709799	Ipo7	importin 7
6.11e-08	10717003	Ect2l	epithelial cell transforming 2-like
6.15e-08	10921343	Rftn1	raftlin lipid raft linker 1
6.16e-08	10750958	Trat1	T cell receptor associated transmembrane adaptor 1
6.25e-08	10791394	Ddx60	DEAD (Asp-Glu-Ala-Asp) box polypeptide 60
6.27e-08	10729293	Tmc1	transmembrane channel-like 1
6.29e-08	10790002	Gnl3	guanine nucleotide binding protein-like 3 (nucleolar)
6.33e-08	10711251	Fus	fused in sarcoma RNA binding protein
6.33e-08	10845072	Zeb2	zinc finger E-box binding homeobox 2
6.38e-08	10728930	Ms4a6c	membrane-spanning 4-domains, subfamily A, member 6C
6.4e-08	10733017	Havcr1	hepatitis A virus cellular receptor 1
6.42e-08	10834098	Il36rn	interleukin 36 receptor antagonist
6.44e-08	10802579	Mex3c	mex-3 RNA binding family member C
6.45e-08	10765462	Sh2d1b2	SH2 domain containing 1B2
6.49e-08	10940681	N/A
6.59e-08	10826547	Mettl14	methyltransferase like 14
6.76e-08	10714338	Zfand5	zinc finger, AN1-type domain 5
6.76e-08	10840867	Hm13; Mcts2	histocompatibility minor 13; malignant T cell amplified sequence 2
6.84e-08	10719728	Atp1a3	ATPase, Na+/K+ transporting, alpha 3 polypeptide
6.85e-08	10804603	Tcof1	Treacher Collins-Franceschetti syndrome 1
6.87e-08	10909783	Usp28	ubiquitin specific peptidase 28
6.92e-08	10839743	Ttl	tubulin tyrosine ligase
6.93e-08	10885586	N/A
6.97e-08	10806296	N/A
6.98e-08	10836169	Rif1	replication timing regulatory factor 1
6.98e-08	10912112	Bcl2a1	BCL2-related protein A1
6.99e-08	10937174	N/A
7.04e-08	10844251	Fnbp1	formin binding protein 1
7.1e-08	10837832	Acp2	acid phosphatase 2, lysosomal
7.15e-08	10860812	LOC102553883; LOC103690031	sterile alpha motif domain-containing protein 9-like
7.15e-08	10860806	LOC103692066; LOC102553788; LOC684193; LOC500013; LOC103690031; Samd9l	sterile alpha motif domain-containing protein 9-like; uncharacterized LOC102553788; similar to sterile alpha motif domain containing 9-like; sterile alpha motif domain containing 9-like [Source:MGI Symbol;Acc:MGI:1343184]
7.15e-08	10860809	LOC103692066; LOC103690031; LOC102553788; LOC684193; LOC500013; Samd9l	sterile alpha motif domain-containing protein 9-like; uncharacterized LOC102553788; similar to sterile alpha motif domain containing 9-like; sterile alpha motif domain containing 9-like [Source:MGI Symbol;Acc:MGI:1343184]
7.18e-08	10840368	Csrp2bp	CSRP2 binding protein
7.19e-08	10714890	Fas	Fas cell surface death receptor
7.25e-08	10761162	Por	P450 (cytochrome) oxidoreductase
7.27e-08	10872994	Hnrnpr	heterogeneous nuclear ribonucleoprotein R
7.3e-08	10883865	Taf1b	TATA box binding protein (Tbp)-associated factor, RNA polymerase I, B
7.38e-08	10923670	Nop58	NOP58 ribonucleoprotein
7.43e-08	10729791	Ifit1bl	interferon-induced protein with tetratricopeptide repeats 1B-like
7.5e-08	10901014	Rasal3	RAS protein activator like 3
7.51e-08	10907585	Aaas	achalasia, adrenocortical insufficiency, alacrimia
7.54e-08	10770666	Smyd2	SET and MYND domain containing 2
7.56e-08	10712506	Tspan32	tetraspanin 32
7.6e-08	10864910	Csgalnact2	chondroitin sulfate N-acetylgalactosaminyltransferase 2
7.63e-08	10914201	Acaa1	acetyl-CoA acyltransferase 1A
7.64e-08	10809370	Nup93	nucleoporin 93
7.76e-08	10852492	Helz2	helicase with zinc finger 2, transcriptional coactivator
7.79e-08	10820163	Pik3cb	phosphatidylinositol-4,5-bisphosphate 3-kinase, catalytic subunit beta
7.92e-08	10940637	N/A
8.04e-08	10902625	Dyrk2	dual-specificity tyrosine-(Y)-phosphorylation regulated kinase 2
8.04e-08	10794756	Rpp40	ribonuclease P/MRP 40 subunit
8.08e-08	10772330	Ociad2	OCIA domain containing 2
8.12e-08	10836956	Eno1	enolase 1, (alpha)
8.13e-08	10873934	Mtor	mechanistic target of rapamycin (serine/threonine kinase)
8.18e-08	10930588	N/A
8.36e-08	10739986	Rnf213	ring finger protein 213
8.37e-08	10877916	Rps6	ribosomal protein S6
8.39e-08	10928684	Bard1	BRCA1 associated RING domain 1
8.45e-08	10769486	N/A
8.52e-08	10854897	LOC100911271; Trbv19; Trbv5; Trbv13-2	uncharacterized LOC100911271 [Source:RGD Symbol;Acc:6493911]; T cell receptor beta, variable 19 [Source:MGI Symbol;Acc:MGI:98604]; T cell receptor beta, variable 5 [Source:MGI Symbol;Acc:MGI:98583]; T cell receptor beta, variable 13-2 [Source:MGI Symbol;Acc:MGI:98608]
8.62e-08	10800726	Map3k2	mitogen activated protein kinase kinase kinase 2
8.65e-08	10850613	N/A
8.68e-08	10856367	Sftpb	surfactant protein B
8.7e-08	10754010	Nepro	nucleolus and neural progenitor protein
8.77e-08	10924876	Psmd1	proteasome 26S subunit, non-ATPase 1
8.79e-08	10936278	N/A
8.79e-08	10850929	N/A
8.8e-08	10841789	Ppp1r16b	protein phosphatase 1, regulatory subunit 16B
8.8e-08	10869267	Hsdl2	hydroxysteroid dehydrogenase like 2
8.84e-08	10777232	Cd38	CD38 molecule
8.88e-08	10750029	Gabpa	GA binding protein transcription factor, alpha subunit
8.89e-08	10763299	Phlpp1	PH domain and leucine rich repeat protein phosphatase 1
8.89e-08	10830408	Rev3l	REV3 like, DNA directed polymerase zeta catalytic subunit
8.93e-08	10728578	Asrgl1	asparaginase like 1
8.99e-08	10779683	Ktn1	kinectin 1 (kinesin receptor)
9.04e-08	10738056	Thra	thyroid hormone receptor alpha
9.04e-08	10877860	Psip1	PC4 and SFRS1 interacting protein 1
9.05e-08	10729771	Ankrd22	ankyrin repeat domain 22
9.07e-08	10862876	Il12rb2	interleukin 12 receptor, beta 2
9.1e-08	10839790	Sirpa	signal-regulatory protein alpha
9.16e-08	10758497	Anapc5	anaphase-promoting complex subunit 5
9.17e-08	10708903	Prkrir	protein-kinase, interferon-inducible double stranded RNA dependent inhibitor, repressor of (P58 repressor)
9.18e-08	10930506	Fam114a1l1	family with sequence similarity 114, member A1-like 1
9.19e-08	10920981	Cx3cr1	chemokine (C-X3-C motif) receptor 1
9.22e-08	10760403	Daglb	diacylglycerol lipase, beta
9.23e-08	10755206	Vps8	vacuolar protein sorting 8 homolog (S. cerevisiae)
9.23e-08	10886378	Calm1	calmodulin 1
9.33e-08	10798558	Aoah	acyloxyacyl hydrolase (neutrophil)
9.46e-08	10760789	Il3ra	interleukin 3 receptor, alpha
9.51e-08	10837520	N/A
9.53e-08	10800993	Cystm1	cysteine-rich transmembrane module containing 1
9.57e-08	10922962	N/A
9.6e-08	10714103	Mpeg1	macrophage expressed 1
9.78e-08	10825276	Pde4dip	phosphodiesterase 4D interacting protein
9.98e-08	10814340	N/A
9.99e-08	10919041	Fam46a	family with sequence similarity 46, member A
1e-07	10871975	Mrps15	mitochondrial ribosomal protein S15
1e-07	10793708	Zcchc6	zinc finger, CCHC domain containing 6
1.01e-07	10851280	Rbl1	retinoblastoma-like 1
1.01e-07	10777328	Lyar	Ly1 antibody reactive
1.01e-07	10707388	Tubgcp5	tubulin, gamma complex associated protein 5
1.03e-07	10756487	Cdx2	caudal type homeo box 2
1.04e-07	10715848	Sfxn2	sideroflexin 2
1.05e-07	10758212	Rilpl2	Rab interacting lysosomal protein-like 2
1.06e-07	10725645	Lat	linker for activation of T cells
1.07e-07	10717935	Sod2	superoxide dismutase 2, mitochondrial
1.08e-07	10895037	LOC100912143	uncharacterized LOC100912143
1.08e-07	10940611	N/A
1.08e-07	10707961	Akap13	A kinase (PRKA) anchor protein 13
1.09e-07	10899826	Pa2g4	proliferation-associated 2G4
1.11e-07	10758711	Trafd1	TRAF type zinc finger domain containing 1
1.12e-07	10739977	Rnf213	ring finger protein 213
1.12e-07	10809044	Bean1	brain expressed, associated with NEDD4, 1
1.12e-07	10763808	Ctse	cathepsin E
1.12e-07	10764388	Dennd1b	DENN/MADD domain containing 1B
1.14e-07	10736957	Acaca	acetyl-CoA carboxylase alpha
1.14e-07	10774310	Wdr92; Ppp3r1	WD repeat domain 92; protein phosphatase 3, regulatory subunit B, alpha
1.14e-07	10928522	N/A
1.14e-07	10940271	Hcfc1	host cell factor C1
1.15e-07	10709020	Pgm2l1	phosphoglucomutase 2-like 1
1.15e-07	10783521	N/A
1.16e-07	10711769	Bccip	BRCA2 and CDKN1A interacting protein
1.16e-07	10815706	Gmps	guanine monophosphate synthase
1.16e-07	10890182	Fkbp3	FK506 binding protein 3
1.17e-07	10828863	Fgd2	FYVE, RhoGEF and PH domain containing 2
1.17e-07	10866030	Olr1	oxidized low density lipoprotein (lectin-like) receptor 1
1.17e-07	10765820	Aim2	absent in melanoma 2
1.18e-07	10932187	N/A
1.18e-07	10905589	St13	suppression of tumorigenicity 13
1.18e-07	10819489	Gbp5	guanylate binding protein 5
1.19e-07	10854190	Irf5	interferon regulatory factor 5
1.19e-07	10709552	RGD1561034	similar to hypothetical protein MGC34805
1.2e-07	10935605	Cd40lg	CD40 ligand
1.22e-07	10713796	Ahnak	AHNAK nucleoprotein
1.22e-07	10843918	Slc2a6	solute carrier family 2 (facilitated glucose transporter), member 6
1.23e-07	10783368	LOC100360220	rCG20053-like [Source:RGD Symbol;Acc:2322530]
1.24e-07	10840565	Sstr4	somatostatin receptor 4
1.24e-07	10744410	Alox12e	arachidonate 12-lipoxygenase, epidermal
1.25e-07	10880610	Rcan3	RCAN family member 3
1.26e-07	10719922	Cyp2s1	cytochrome P450, family 2, subfamily s, polypeptide 1
1.27e-07	10752050	Tra2b	transformer 2 beta homolog (Drosophila)
1.28e-07	10736661	Psmd11	proteasome 26S subunit, non-ATPase 11
1.28e-07	10852987	Srpk2	SRSF protein kinase 2
1.28e-07	10739302	Axin2	axin 2
1.29e-07	10912396	Gk5	glycerol kinase 5 (putative)
1.31e-07	10717141	Arhgap18	Rho GTPase activating protein 18
1.32e-07	10892409	Lrp3; LOC314492; Ighg	low density lipoprotein receptor-related protein 3; immunoglobulin heavy chain variable region; Immunoglobulin heavy chain (gamma polypeptide)
1.32e-07	10916686	Pdzd3	PDZ domain containing 3
1.33e-07	10703715	Mboat7	membrane bound O-acyltransferase domain containing 7
1.34e-07	10838538	Fmn1	formin 1
1.37e-07	10868191	N/A
1.37e-07	10798580	N/A
1.37e-07	10935831	Gabrq	gamma-aminobutyric acid (GABA) A receptor, theta
1.38e-07	10806106	Tom1	target of myb1 membrane trafficking protein
1.41e-07	10740240	Narf; Foxk2	nuclear prelamin A recognition factor; forkhead box K2
1.42e-07	10749983	Cxadr	coxsackie virus and adenovirus receptor
1.42e-07	10797321	N/A
1.43e-07	10919214	Syncrip	synaptotagmin binding, cytoplasmic RNA interacting protein
1.44e-07	10916659	Oaf	out at first homolog
1.45e-07	10773849	Osm	oncostatin M
1.46e-07	10812229	Ttc37	tetratricopeptide repeat domain 37
1.47e-07	10928254	Orc2	origin recognition complex, subunit 2
1.47e-07	10724047	N/A
1.47e-07	10856415	Capg	capping protein (actin filament), gelsolin-like
1.48e-07	10859027	Cracr2a	calcium release activated channel regulator 2A
1.48e-07	10776347	Paics	phosphoribosylaminoimidazole carboxylase, phosphoribosylaminoimidazole succinocarboxamide synthetase
1.48e-07	10905765	Tcf20	transcription factor 20
1.5e-07	10713328	Map4k2	mitogen activated protein kinase kinase kinase kinase 2
1.5e-07	10867010	Amn1	antagonist of mitotic exit network 1 homolog (S. cerevisiae)
1.57e-07	10770070	Cadm3	cell adhesion molecule 3
1.58e-07	10791987	N/A
1.58e-07	10783393	N/A
1.58e-07	10707707	Mtmr10	myotubularin related protein 10
1.6e-07	10702165	L3mbtl3	l(3)mbt-like 3 (Drosophila)
1.6e-07	10780049	LOC100360891; RGD1563780	RGD1359684 protein-like [Source:RGD Symbol;Acc:2321267]; similar to RIKEN cDNA A430107P09 gene [Source:RGD Symbol;Acc:1563780]
1.61e-07	10849943	Slc4a11; RGD1565616	solute carrier family 4, sodium borate transporter, member 11; RGD1565616
1.63e-07	10821276	Map3k1	mitogen activated protein kinase kinase kinase 1
1.64e-07	10916880	Kmt2a	lysine (K)-specific methyltransferase 2A
1.65e-07	10740209	Slc16a3	solute carrier family 16 (monocarboxylate transporter), member 3
1.65e-07	10898335	Atxn10	ataxin 10
1.66e-07	10783501	N/A
1.66e-07	10880233	Ythdf2	YTH N(6)-methyladenosine RNA binding protein 2
1.67e-07	10776597	Nipal1	NIPA-like domain containing 1
1.68e-07	10938346	Pola1	polymerase (DNA directed), alpha 1, catalytic subunit
1.69e-07	10849172	Spg11	spastic paraplegia 11 (autosomal recessive)
1.71e-07	10751469	Parp14	poly (ADP-ribose) polymerase family, member 14
1.72e-07	10806927	Gab1	GRB2-associated binding protein 1
1.72e-07	10809399	Mt2A	metallothionein 2A
1.74e-07	10779940	N/A
1.74e-07	10868662	Zcchc7	zinc finger, CCHC domain containing 7
1.75e-07	10780507	Nfatc4	nuclear factor of activated T-cells, cytoplasmic, calcineurin-dependent 4
1.76e-07	10923182	Inpp1	inositol polyphosphate-1-phosphatase
1.77e-07	10899204	Larp4	La ribonucleoprotein domain family, member 4
1.77e-07	10841037	Asxl1	additional sex combs like transcriptional regulator 1
1.78e-07	10929541	Sp110	SP110 nuclear body protein
1.79e-07	10833688	Fig4	FIG4 phosphoinositide 5-phosphatase
1.8e-07	10710513	Polr3e	polymerase (RNA) III (DNA directed) polypeptide E
1.8e-07	10919433	Slc25a36	solute carrier family 25 (pyrimidine nucleotide carrier ), member 36
1.82e-07	10938858	Abcb7	ATP-binding cassette, subfamily B (MDR/TAP), member 7
1.84e-07	10915740	LOC103690166	zinc finger protein OZF-like
1.84e-07	10833287	N/A
1.85e-07	10936346	Lonrf3	LON peptidase N-terminal domain and ring finger 3
1.86e-07	10868315	Nfx1	nuclear transcription factor, X-box binding 1
1.86e-07	10907992	Ccdc82	coiled-coil domain containing 82
1.87e-07	10844808	Strbp	spermatid perinuclear RNA binding protein
1.88e-07	10925687	Fam174a	family with sequence similarity 174, member A
1.9e-07	10772408	Tec	tec protein tyrosine kinase
1.91e-07	10756386	Ubl3	ubiquitin-like 3
1.91e-07	10805335	Slc14a1	solute carrier family 14 (urea transporter), member 1
1.93e-07	10889719	LOC100362999	hsc70-interacting protein-like; hsc70-interacting protein-like [Source:RGD Symbol;Acc:2323695]
1.95e-07	10830261	Fam26f	family with sequence similarity 26, member F
1.95e-07	10847538	Slc35c1	solute carrier family 35 (GDP-fucose transporter), member C1
1.96e-07	10879879	Zmym4	zinc finger, MYM-type 4
1.96e-07	10841850	Plcg1	phospholipase C, gamma 1
1.97e-07	10710857	Tufm	Tu translation elongation factor, mitochondrial
1.98e-07	10767987	Nav1	neuron navigator 1
2e-07	10766289	Cnih4	cornichon family AMPA receptor auxiliary protein 4
2.03e-07	10755069	Lpp	LIM domain containing preferred translocation partner in lipoma
2.04e-07	10737019	Ube2i	ubiquitin-conjugating enzyme E2I
2.04e-07	10734258	Grap	GRB2-related adaptor protein
2.05e-07	10830498	Ak9	adenylate kinase 9
2.06e-07	10839857	Nop56	NOP56 ribonucleoprotein
2.09e-07	10885396	Zbtb1	zinc finger and BTB domain containing 1
2.1e-07	10899619	Hnrnpa1	heterogeneous nuclear ribonucleoprotein A1
2.13e-07	10800522	Elp2	elongator acetyltransferase complex subunit 2
2.16e-07	10771171	Mpa2l	macrophage activation 2 like
2.18e-07	10894878	Lta4h	leukotriene A4 hydrolase
2.18e-07	10767985	N/A
2.19e-07	10886040	Batf	basic leucine zipper transcription factor, ATF-like
2.19e-07	10705553	N/A
2.24e-07	10927538	Rev1	REV1, polymerase (DNA directed)
2.24e-07	10940501	N/A
2.27e-07	10716646	Ginm1	glycoprotein integral membrane 1
2.29e-07	10738671	Hexim1	hexamethylene bis-acetamide inducible 1
2.29e-07	10921527	Rpl7l1	ribosomal protein L7-like 1
2.3e-07	10922286	Dst	dystonin
2.33e-07	10746000	Gdpd1	glycerophosphodiester phosphodiesterase domain containing 1
2.35e-07	10902564	Mdm2	MDM2 proto-oncogene, E3 ubiquitin protein ligase
2.35e-07	10826859	Aimp1	aminoacyl tRNA synthetase complex-interacting multifunctional protein 1
2.37e-07	10924669	LOC102551819	U3 small nucleolar RNA-associated protein 14 homolog B-like; U3 small nucleolar RNA-associated protein 14 homolog B-like [Source:RGD Symbol;Acc:7514331]
2.39e-07	10754384	Cd86	CD86 molecule
2.39e-07	10722770	Chd2	chromodomain helicase DNA binding protein 2
2.39e-07	10725908	Pagr1; Mvp	Paxip1-associated glutamate-rich protein 1; major vault protein
2.42e-07	10805375	Setbp1	SET binding protein 1
2.42e-07	10768332	Rgs2	regulator of G-protein signaling 2
2.45e-07	10733139	Gfpt2	glutamine-fructose-6-phosphate transaminase 2
2.45e-07	10860528	RGD1562636	similar to protein phosphatase 1, regulatory (inhibitor) subunit 3B
2.48e-07	10830654	Prep	prolyl endopeptidase
2.49e-07	10708538	N/A
2.53e-07	10783507	RGD1311300; LOC290071	similar to T cell receptor V delta 6; similar to T cell receptor V-alpha J-alpha
2.56e-07	10715268	LOC103690185; LOC103690184; LOC102555476; Cc2d2b	protein CC2D2B-like; uncharacterized LOC102555476; coiled-coil and C2 domain containing 2B
2.59e-07	10894304	Actl9	actin-like 9
2.59e-07	10855576	Tax1bp1	Tax1 (human T-cell leukemia virus type I) binding protein 1
2.59e-07	10803394	B4galt6	UDP-Gal:betaGlcNAc beta 1,4-galactosyltransferase, polypeptide 6
2.61e-07	10862464	Dfna5	deafness, autosomal dominant 5 (human)
2.65e-07	10880033	Lck	LCK proto-oncogene, Src family tyrosine kinase
2.65e-07	10919377	Atp1b3	ATPase, Na+/K+ transporting, beta 3 polypeptide
2.66e-07	10779162	Dnajc9	DnaJ (Hsp40) homolog, subfamily C, member 9
2.67e-07	10761025	LOC100910669; Pilra	paired immunoglobulin-like type 2 receptor alpha-like; paired immunoglobin-like type 2 receptor alpha [Source:RGD Symbol;Acc:1562847]
2.68e-07	10822799	Mccc1	methylcrotonoyl-CoA carboxylase 1 (alpha)
2.68e-07	10805794	Got2	glutamic-oxaloacetic transaminase 2, mitochondrial
2.7e-07	10729094	N/A
2.73e-07	10773340	Tbc1d14	TBC1 domain family, member 14
2.79e-07	10769138	Rabgap1l	RAB GTPase activating protein 1-like
2.81e-07	10827216	Clca5	chloride channel calcium activated 5
2.86e-07	10940522	N/A
2.86e-07	10869158	Zfp462	zinc finger protein 462
2.86e-07	10814817	Ttc14	tetratricopeptide repeat domain 14
2.86e-07	10801271	RGD735029	SEL1 domain containing protein RGD735029
2.89e-07	10898851	Pphln1	periphilin 1
2.9e-07	10884831	Fam179b	family with sequence similarity 179, member B
2.9e-07	10940623	N/A
2.91e-07	10757258	Lamtor4	late endosomal/lysosomal adaptor, MAPK and MTOR activator 4
2.92e-07	10825925	Gstm1	glutathione S-transferase mu 1
2.92e-07	10874245	Nol9	nucleolar protein 9
2.95e-07	10919996	Manf	mesencephalic astrocyte-derived neurotrophic factor
2.95e-07	10714537	Smarca2	SWI/SNF related, matrix associated, actin dependent regulator of chromatin, subfamily a, member 2
2.95e-07	10795957	Gtpbp4; LOC299312; LOC102557474; LOC103690178; LOC102556882; LOC103694473	GTP binding protein 4; similar to G protein-binding protein CRFG; uncharacterized LOC102557474; nucleolar GTP-binding protein 1-like; GTP binding protein 4 [Source:RGD Symbol;Acc:620783]; uncharacterized LOC103694473
2.98e-07	10867657	Gem	GTP binding protein overexpressed in skeletal muscle
3e-07	10737378	Ccdc182	coiled-coil domain containing 182
3.04e-07	10789740	Fam213a	family with sequence similarity 213, member A
3.06e-07	10725519	Arhgap17	Rho GTPase activating protein 17
3.06e-07	10881685	Kif1b	kinesin family member 1B
3.07e-07	10823508	Ccnl1	cyclin L1
3.1e-07	10798135	Serpinb9	serpin peptidase inhibitor, clade B (ovalbumin), member 9
3.1e-07	10937962	Sh3kbp1	SH3-domain kinase binding protein 1
3.1e-07	10857314	Slc6a6	solute carrier family 6 (neurotransmitter transporter), member 6
3.11e-07	10798624	LOC100912942	uncharacterized LOC100912942
3.13e-07	10904018	Fam49b	family with sequence similarity 49, member B
3.15e-07	10753024	Urb1	URB1 ribosome biogenesis 1 homolog (S. cerevisiae)
3.16e-07	10712853	Clcf1	cardiotrophin-like cytokine factor 1
3.17e-07	10873606	Atp13a2	ATPase type 13A2
3.17e-07	10935843	N/A
3.18e-07	10827438	Rabggtb	Rab geranylgeranyltransferase, beta subunit
3.19e-07	10731385	Parn	poly(A)-specific ribonuclease
3.2e-07	10784446	Defb42	defensin beta 42
3.2e-07	10865993	Cd69	Cd69 molecule
3.21e-07	10703139	Rnaset2	ribonuclease T2
3.22e-07	10885618	Exd2	exonuclease 3-5 domain containing 2
3.24e-07	10752257	N/A
3.25e-07	10759538	Map2k7	mitogen activated protein kinase kinase 7
3.31e-07	10879453	Smap2	small ArfGAP2
3.34e-07	10822377	Zc2hc1a	zinc finger, C2HC-type containing 1A
3.35e-07	10773725	Morc2	MORC family CW-type zinc finger 2
3.35e-07	10880056	Khdrbs1	KH domain containing, RNA binding, signal transduction associated 1
3.36e-07	10705679	Map4k1	mitogen activated protein kinase kinase kinase kinase 1
3.4e-07	10940250	Naa10	N(alpha)-acetyltransferase 10, NatA catalytic subunit
3.4e-07	10923835	Nrp2	neuropilin 2
3.4e-07	10926181	Plcl2	phospholipase C-like 2
3.4e-07	10710993	LOC308990	hypothetical protein LOC308990
3.46e-07	10732676	Stk10	serine/threonine kinase 10
3.46e-07	10715721	Nolc1	nucleolar and coiled-body phosphoprotein 1
3.47e-07	10739497	Tmem104	transmembrane protein 104
3.52e-07	10918345	Usp3	ubiquitin specific peptidase 3
3.53e-07	10912908	Cish	cytokine inducible SH2-containing protein
3.53e-07	10722517	Mir344-1; Mir344a-2	microRNA 344-1; microRNA 344a-2
3.55e-07	10783553	Prmt5	protein arginine methyltransferase 5
3.56e-07	10883716	E2f6	E2F transcription factor 6
3.56e-07	10917448	Acat1	acetyl-CoA acetyltransferase 1
3.6e-07	10821450	Itga1	integrin, alpha 1
3.65e-07	10914609	Ccr3	chemokine (C-C motif) receptor 3
3.7e-07	10724449	Fam160a2	family with sequence similarity 160, member A2
3.73e-07	10837648	Nup160	nucleoporin 160
3.74e-07	10866672	Recql	RecQ helicase-like
3.75e-07	10713538	Pla2g16	phospholipase A2, group XVI
3.77e-07	10729350	Smc5	structural maintenance of chromosomes 5
3.79e-07	10870316	N/A
3.79e-07	10724377	Trim5	tripartite motif-containing 5
3.84e-07	10824434	Slc50a1	solute carrier family 50 (sugar efflux transporter), member 1
3.88e-07	10906649	Rpap3	RNA polymerase II associated protein 3
3.92e-07	10775769	2011-09-01	septin 11
3.94e-07	10733004	Med7	mediator complex subunit 7
3.97e-07	10934585	Atp7a	ATPase, Cu++ transporting, alpha polypeptide
3.98e-07	10898408	Gramd4	GRAM domain containing 4
4e-07	10800760	Bin1	bridging integrator 1
4e-07	10876594	Trim14	tripartite motif-containing 14
4.02e-07	10745604	LOC688925	similar to Glutathione S-transferase alpha-4
4.04e-07	10867944	Ndufaf4	NADH dehydrogenase (ubiquinone) complex I, assembly factor 4
4.05e-07	10726691	Sigirr	single immunoglobulin and toll-interleukin 1 receptor (TIR) domain
4.06e-07	10813128	Arl15	ADP-ribosylation factor-like 15
4.06e-07	10743468	Prpsap2	phosphoribosyl pyrophosphate synthetase-associated protein 2
4.07e-07	10809581	Rbl2	retinoblastoma-like 2
4.1e-07	10744134	Eif4a1	eukaryotic translation initiation factor 4A1
4.1e-07	10707626	Ube3a	ubiquitin protein ligase E3A
4.14e-07	10925060	Inpp5d	inositol polyphosphate-5-phosphatase D
4.14e-07	10885235	Prkch	protein kinase C, eta
4.14e-07	10784135	N6amt2	N-6 adenine-specific DNA methyltransferase 2 (putative)
4.16e-07	10830841	RT1-M3-1	RT1 class Ib, locus M3, gene 1
4.16e-07	10770764	Diexf	digestive organ expansion factor homolog (zebrafish)
4.22e-07	10917727	Neil1	nei-like DNA glycosylase 1
4.26e-07	10858686	Phb2	prohibitin 2
4.31e-07	10859814	Ube3c	ubiquitin protein ligase E3C
4.34e-07	10809604	Chd9	chromodomain helicase DNA binding protein 9
4.35e-07	10794464	Tpmt	thiopurine S-methyltransferase
4.36e-07	10718344	Has1	hyaluronan synthase 1
4.38e-07	10826771	Gar1	GAR1 homolog, ribonucleoprotein
4.4e-07	10922650	Inpp4a	inositol polyphosphate-4-phosphatase, type I
4.42e-07	10883540	Laptm4a	lysosomal protein transmembrane 4 alpha
4.44e-07	10776915	Tbc1d1	TBC1 (tre-2/USP6, BUB2, cdc16) domain family, member 1
4.45e-07	10940565	N/A
4.46e-07	10819787	Dnajb4	DnaJ (Hsp40) homolog, subfamily B, member 4
4.51e-07	10742533	Jade2	jade family PHD finger 2
4.51e-07	10918118	Map2k5	mitogen activated protein kinase kinase 5
4.51e-07	10742674	Cdc42se2	CDC42 small effector 2
4.53e-07	10704499	Ap2s1	adaptor-related protein complex 2, sigma 1 subunit
4.55e-07	10816483	Mef2d	myocyte enhancer factor 2D
4.56e-07	10815888	Smc4	structural maintenance of chromosomes 4
4.57e-07	10899367	Acvr1b	activin A receptor, type IB
4.57e-07	10816712	Fam189b	family with sequence similarity 189, member B
4.6e-07	10930534	Rpl5l1	ribosomal protein L5-like 1 [Source:RGD Symbol;Acc:1564051]
4.6e-07	10903545	Eif3e	eukaryotic translation initiation factor 3, subunit E
4.6e-07	10717295	Vnn1	vanin 1
4.61e-07	10897952	L3mbtl2	l(3)mbt-like 2 (Drosophila)
4.64e-07	10865672	Cd27	CD27 molecule
4.66e-07	10867461	Lyn	LYN proto-oncogene, Src family tyrosine kinase
4.68e-07	10772863	Arap2	ArfGAP with RhoGAP domain, ankyrin repeat and PH domain 2
4.68e-07	10831162	Ncr3	natural cytotoxicity triggering receptor 3
4.68e-07	10896322	Dcstamp	dendrocyte expressed seven transmembrane protein
4.75e-07	10818114	St7l	suppression of tumorigenicity 7-like
4.77e-07	10825712	Ddx20	DEAD (Asp-Glu-Ala-Asp) box polypeptide 20
4.78e-07	10917645	Scaper	S-phase cyclin A-associated protein in the ER
4.82e-07	10763367	Serpinb2	serpin peptidase inhibitor, clade B (ovalbumin), member 2
4.85e-07	10903583	N/A
4.86e-07	10765639	Slamf1	signaling lymphocytic activation molecule family member 1
4.86e-07	10869476	Orm1	orosomucoid 1
4.88e-07	10931620	Adrbk2	adrenergic, beta, receptor kinase 2
4.92e-07	10800098	Thoc1	THO complex 1
4.93e-07	10933651	Sms	spermine synthase
4.95e-07	10783763	Ap1g2	adaptor-related protein complex 1, gamma 2 subunit
4.95e-07	10928524	Klf7	Kruppel-like factor 7 (ubiquitous)
4.95e-07	10820362	Msh3	mutS homolog 3
4.96e-07	10827782	RT1-N2; RT1-N1	RT1 class Ib, locus N2; RT1 class Ib, locus N1
